# Supplementary material for: Distinct Gut Microbiota Composition and Functional Category in Children With Cerebral Palsy and Epilepsy
Source: Front Pediatr. 2019 Oct 1;7:394. doi: 10.3389/fped.2019.00394 (PMC6779726; doi:10.3389/fped.2019.00394)
Supplement: Supplementary File 1 — Background information for enrolled subjects. [file Table_1.XLSX]

## Sheet: Sheet1
Sample ID	Gender	Age (Month)	Hight (cm)	Weight (kg)	Delivery Pattern	Feeding Pattern	Clinical information
W01	NA	NA	NA	NA	NA	NA	Cerebral palsy and epilepsy
W02	NA	NA	NA	NA	NA	NA	Cerebral palsy and epilepsy
W07	Male	68	98	13.4	NA	NA	Cerebral palsy and epilepsy
W08	Male	39	85	8.6	NA	NA	Cerebral palsy and epilepsy
W09	Female	99	103	13.5	NA	NA	Cerebral palsy and epilepsy
W10	Male	48	91	8.5	NA	NA	Cerebral palsy and epilepsy
W11	Female	95	85	7.4	NA	NA	Cerebral palsy and epilepsy
W12	Male	58	95	11	NA	NA	Cerebral palsy and epilepsy
W13	Male	137	120	17	NA	NA	Cerebral palsy and epilepsy
W14	Female	106	102	11.3	NA	NA	Cerebral palsy and epilepsy
W15	Male	144	115	15	NA	NA	Cerebral palsy and epilepsy
W16	Male	93	89	11.1	NA	NA	Cerebral palsy and epilepsy
W17	Male	144	112	12.5	NA	NA	Cerebral palsy and epilepsy
W18	Male	109	121	14.6	NA	NA	Cerebral palsy and epilepsy
W19	Female	159	147	32	NA	NA	Cerebral palsy and epilepsy
W20	Female	162	118	19.3	NA	NA	Cerebral palsy and epilepsy
W21	Female	114	123	19.5	NA	NA	Cerebral palsy and epilepsy
W22	Male	172	117	12.6	NA	NA	Cerebral palsy and epilepsy
W23	Female	39	87	9.5	NA	NA	Cerebral palsy and epilepsy
W24	Female	148	115	15.3	NA	NA	Cerebral palsy and epilepsy
W25	Female	133	113	17	NA	NA	Cerebral palsy and epilepsy
W26	Male	49	85	8.5	NA	NA	Cerebral palsy and epilepsy
W27	Female	159	128	24.5	NA	NA	Cerebral palsy and epilepsy
W28	Male	81	90	16	NA	NA	Cerebral palsy and epilepsy
W30	Male	131	106	11.5	NA	NA	Cerebral palsy and epilepsy
9001609	Male	77	120	32	Cesarean section	Formula feeding	Healthy
9001610	Female	98	NA	NA	NA	NA	Healthy
9001642	Female	61	110	20.8	Cesarean section	Formula feeding	Healthy
9001643	Male	67	110	21	Natural delivery	Mixed	Healthy
9001644	Male	93	NA	NA	NA	NA	Healthy
9001646	Male	56	112	20	Cesarean section	Breastfeeding	Healthy
9001654	Female	106	NA	NA	NA	NA	Healthy
9001655	Male	61	113	38	Natural delivery	Breastfeeding	Healthy
9001672	Female	53	105	17	Cesarean section	Mixed	Healthy
9001676	Male	92	125	21	Natural delivery	Mixed	Healthy
9001680	Female	55	105	17.5	NA	NA	Healthy
9001682	Male	39	105	16.6	Natural delivery	Breastfeeding	Healthy
9001685	Male	83	120	22	Natural delivery	Breastfeeding	Healthy
9001695	Male	67	110	19.5	Cesarean section	Mixed	Healthy
9001705	Male	68	115.2	21.8	NA	NA	Healthy
9001709	Female	38	131.9	33	NA	NA	Healthy
9001711	Female	99	95	16	Natural delivery	Mixed	Healthy
9001719	Female	87	123	18	Natural delivery	Formula feeding	Healthy
9001725	Male	46	98	27	Natural delivery	Breastfeeding	Healthy
9001728	Female	87	120.8	24.9	NA	NA	Healthy
9001742	Male	46	100	16	Natural delivery	Breastfeeding	Healthy
