# Supplementary material for: Distinct Gut Microbiota Composition and Functional Category in Children With Cerebral Palsy and Epilepsy
Source: Front Pediatr. 2019 Oct 1;7:394. doi: 10.3389/fped.2019.00394 (PMC6779726; doi:10.3389/fped.2019.00394)
Supplement: Supplementary File 2 — Distribution of GM in all subjects at the phylum and genus levels. [file Table_2.XLSX]

## Sheet: Phylum
Phylum	W01	W02	W07	W08	W09	W10	W11	W12	W13	W14	W15	W16	W17	W18	W19	W20	W21	W22	W23	W24	W25	W26	W27	W28	W30	9001609	9001610	9001642	9001643	9001644	9001646	9001654	9001655	9001672	9001676	9001680	9001682	9001685	9001695	9001705	9001709	9001711	9001719	9001725	9001728	9001742
Acidobacteria	1.99912	0.063912	0.059471	0.031717	0.246047	0.041785	0.015003	0.060017	0.036513	0.006671	0.019748	0.010621	0.00782	0.012248	0.015852	0.038967	0.021768	0.014149	0.014986	0.022618	0.021109	0.005581	0.008841	0	0	0	0	0	0	0	0	0	0	0	0	0.006961	0	0	0	0	0	0	0	0	0	0
Actinobacteria	11.2088	29.4702	5.72906	1.3189	23.6523	35.7744	49.3098	32.5549	43.7497	40.9908	24.045	39.1934	51.2884	44.7462	53.5959	45.1978	24.5089	59.1935	62.6199	15.721	40.4877	51.7663	23.3029	71.435	25.2853	1.60808	0.363861	0.818888	0.644881	0.39537	12.8676	1.25305	0.261461	1.52835	0.497711	0.720501	0.854073	2.15789	0.558483	1.72376	1.82163	8.10279	0.556812	0.141643	0.338694	0.25727
Armatimonadetes	0.026343	0.009321	0.009011	0.002643	0.020734	0.006739	0.006001	0.015004	0.002921	0	0.001411	0	0	0	0	0.003388	0	0	0	0	0	0	0	0	0	0	0	0	0	0	0	0	0	0	0	0	0	0	0	0	0	0	0	0	0	0
Bacteroidetes	46.0925	1.80286	67.5521	63.3641	21.3107	37.1034	29.5625	20.3143	29.6265	29.2898	10.6867	4.42125	9.25745	10.0283	5.47835	4.94706	25.2748	2.40538	10.5949	13.0124	3.93324	1.51794	13.9302	13.617	36.3684	9.51036	65.2572	63.0299	78.1629	74.3947	58.1504	52.4903	61.4723	48.6938	51.5438	42.5096	55.4137	57.3877	42.2359	45.3192	54.1642	55.0335	73.4757	59.2726	76.915	58.5068
Candidatus_Saccharibacteria	0.002927	0	0.001802	0.003965	0.029028	0.04448	0.015003	0.069565	0	0.013342	0.011285	0.02731	0.009776	0.022966	0.018495	0.005083	0.005442	0.014149	0.014986	0.022618	0.022516	0.078129	0.058939	0	0.009228	0.006185	0.002378	0.002225	0	0.002038	0	0	0	0	0.003072	0	0	0	0	0.003134	0	0.00452	0	0	0.002243	0
Chlamydiae	0.027806	0.015978	0.010813	0.005286	0.012441	0.006739	0.003001	0.015004	0.007303	0	0	0	0	0	0	0	0	0	0	0	0	0	0	0	0	0	0	0	0	0	0	0	0	0	0	0	0	0	0	0	0	0	0	0	0	0
Chloroflexi	0.083419	0.018641	0.027032	0.013215	0.023499	0.014827	0.009002	0.036828	0.007303	0	0	0	0	0	0	0	0	0	0	0.001414	0	0	0	0	0	0	0	0	0	0	0	0	0	0	0	0	0	0	0	0	0	0	0	0	0	0
Deinococcus-Thermus	0.005854	0	0.003604	0	0	0	0	0	0	0	0	0	0	0	0	0	0	0	0	0	0	0	0	0	0	0	0	0	0	0	0	0	0	0	0	0	0	0	0	0	0	0	0	0	0	0
Elusimicrobia	0.002927	0	0	0	0	0	0	0	0	0.001334	0.008464	0.001517	0	0	0.001321	0	0	0	0	0.001414	0.001407	0	0	0	0	0	0	0	0	0	0	0	0	0	0	0	0	0	0	0	0	0	0	0	0	0
Firmicutes	26.334	60.5542	11.9681	13.2736	33.8895	20.7346	15.2914	37.9128	20.4677	26.3532	53.8001	44.0122	32.8635	32.8653	38.8068	41.2063	47.3308	27.676	25.4177	66.326	52.6913	41.7601	57.8897	9.74164	34.5966	88.3373	27.946	33.1583	19.7226	23.7792	26.0925	43.8175	35.884	45.9037	44.6803	54.7163	43.3626	35.6488	55.0883	51.4934	40.3026	34.1696	24.3973	38.8734	21.4544	40.8435
Fusobacteria	0.001463	0.001332	0.001802	0.014537	0.002765	0.006739	0.039009	0.00682	0.002921	0.620405	0.11708	2.06042	0.125127	0.571079	0.044915	0.067768	0.042175	0.056597	0.044957	0.344925	0.094285	0.08371	2.07759	0.005592	0	0.004123	2.60173	0.002225	0.016535	0.006114	0	0	0.040672	0.026657	0	0.006961	0.013775	0	0.002428	0	0.017622	0.013561	0.098135	0.005059	0.002243	0.005197
Gemmatimonadetes	0.128787	0.002663	0.001802	0.003965	0.015205	0	0	0.00682	0.001461	0	0.001411	0.001517	0	0.001531	0	0	0	0	0	0	0	0	0.001473	0	0	0	0	0	0	0	0	0	0	0	0	0	0	0	0	0	0	0	0	0	0	0
Latescibacteria	0.020489	0	0	0	0	0	0	0	0	0	0	0	0	0	0	0.001694	0	0	0	0	0	0	0	0	0	0	0	0	0	0	0	0	0	0	0	0	0	0	0	0	0	0	0	0	0	0
Lentisphaerae	0	0.001332	0	0	0.004147	0.001348	0	0	0.002921	0	0	0	0	0	0	0	0.002721	0	0	0.001414	0.007036	0	0	2.16419	0.461411	0	0	0	0.002067	0.07133	0	0.00394	0	0	0	0	0	0.046067	0	0	0	0	0	0	0	0
Nitrospirae	0.117079	0.006658	0	0.003965	0.056674	0.001348	0	0.00682	0	0.001334	0.002821	0	0	0	0.002642	0	0	0	0	0.001414	0	0	0	0	0	0	0	0	0	0	0	0	0	0	0	0	0	0	0	0	0	0	0	0	0	0
Planctomycetes	0.002927	0.018641	0	0	0.009676	0	0	0	0	0	0	0	0	0	0	0	0	0	0	0	0	0	0	0	0	0	0	0	0	0	0	0	0	0	0	0	0	0	0	0	0	0	0	0	0	0
Proteobacteria	11.162	7.60023	14.0514	17.2475	16.2114	4.96698	0.807178	8.13226	5.88295	2.21078	3.70987	1.23352	5.67373	8.02572	1.25499	1.53494	2.16859	1.64839	0.87854	1.68928	2.13619	0.58597	2.0437	1.34772	2.22092	0.509226	3.82887	2.9885	1.35177	1.32265	2.80784	2.43518	2.34153	3.60761	3.27506	2.03968	0.34668	4.61643	2.11495	1.39468	2.42296	2.64443	1.46563	1.69972	1.15963	0.382007
Spirochaetes	0	0.001332	0	0	0.016587	0	0	0	0.004382	0	0	0	0	0	0	0	0	0.007075	0	0	0	0	0	0	0	0	0	0	0	0	0	0	0	0	0	0	0	0	0	0	0	0	0	0	0	0
Synergistetes	0.001463	0.001332	0	0	0.001382	0	0	0.001364	0.001461	0.005337	0.014106	0.015172	0.046923	0.010717	0.003963	0.028801	0.012244	0.070746	0.001873	0.012723	0.004222	0.022323	0.008841	0.307572	0.043065	0.006185	0	0	0.014468	0	0	0	0	0.226586	0	0	0	0.004849	0	0	0	0	0	0	0.006729	0
Tenericutes	0	0	0	0	0.005529	0	0	0	0	0	0	0	0	0.003062	0	0	0.00136	0	0	0	0	0	0	0	0	0	0	0	0	0	0	0	0	0	0	0	0	0	0	0	0	0	0	0	0	0
Verrucomicrobia	0.681984	0.105189	0.261313	4.54744	3.82478	1.04731	4.87607	0.529238	0.070105	0.233486	2.05665	8.33118	0.312818	3.27949	0.107004	3.42736	0.300664	7.84577	0.187322	2.27877	0.167462	3.92321	0.131139	1.37569	0.787474	0.002062	0	0	0.008268	0	0.071472	0	0	0.004443	0	0	0.004592	0.133353	0	0	1.24012	0.031643	0	0.005059	0.121122	0.002599
Unclassified	2.1001	0.326219	0.322586	0.169158	0.667643	0.24936	0.066015	0.338276	0.135828	0.273512	5.52531	0.691863	0.414483	0.433285	0.669767	3.54087	0.330594	1.06827	0.224786	0.564037	0.43343	0.256711	0.546657	0.005592	0.227629	0.016493	0	0	0.076476	0.028532	0.01021	0	0	0.008886	0	0	0.004592	0.004849	0	0.065816	0.030838	0	0.0064	0.002529	0	0.002599

## Sheet: Genus
Genus	W01	W02	W07	W08	W09	W10	W11	W12	W13	W14	W15	W16	W17	W18	W19	W20	W21	W22	W23	W24	W25	W26	W27	W28	W30	9001609	9001610	9001642	9001643	9001644	9001646	9001654	9001655	9001672	9001676	9001680	9001682	9001685	9001695	9001705	9001709	9001711	9001719	9001725	9001728	9001742
Abiotrophia	0.007317	0.001332	0	0.005286	0	0.001348	0	0.001364	0	0.044029	0.033854	0.054621	0.039102	0.255684	0.022458	0.044049	0.068024	0	0.014986	0.106022	0.033774	0.022323	0.303535	0	0	0	0	0	0	0.002038	0	0	0	0	0	0	0	0	0	0.003134	0	0	0	0	0	0
Acetanaerobacterium	0	0	0	0	0	0	0	0	0	0	0	0	0.005865	0	0	0	0	0	0	0	0	0	0	0	0	0	0	0	0	0	0	0	0	0	0	0	0	0	0	0	0	0	0	0	0	0
Acetobacteroides	0.005854	0	0	0	0	0	0	0.001364	0	0	0	0	0.001955	0	0	0.001694	0	0	0	0	0	0	0	0	0	0	0	0	0	0	0	0	0	0	0	0	0	0	0	0	0	0	0	0	0	0
Acidaminococcus	0.071711	0.04394	0.014417	0.031717	0.991098	0.142876	0.015003	0.050469	1.59926	3.74778	0.390735	0.260966	0.189646	0.225063	1.88512	0.489623	16.9079	0.070746	0.086168	0.270003	0.233602	0.111613	0.698425	0.469746	0.052293	0	0	0	0	0	0	0	0	0	0	0	0	0	0	0	0.134364	0	0	0	0.002243	0
Aciditerrimonas	0.010244	0	0	0	0	0	0	0	0	0	0	0	0	0	0	0	0	0	0	0	0	0	0	0	0	0	0	0	0	0	0	0	0	0	0	0	0	0	0	0	0	0	0	0	0	0
Acinetobacter	0.162447	0.05326	0.232479	0.035682	0.077408	0.032349	0.021005	0.118669	0.021908	0.004003	0.042318	0.007586	0.011731	0.006124	0.006605	0.010165	0.004081	0	0.009366	0.002827	0.011258	0.005581	0.008841	0.016777	0	0	0	0	0	0.002038	0	0.00394	0	0.022214	0.003072	0.003481	0	0.046067	0	0	0	0.00226	0	0.005059	0	0
Actinomadura	0.026343	0.005326	0.003604	0.002643	0.004147	0.002696	0	0.008184	0.002921	0	0	0	0	0	0	0	0	0	0	0	0	0	0	0	0	0	0	0	0	0	0	0	0	0	0	0	0	0	0	0	0	0	0	0	0	0
Actinomyces	0.035124	0.225024	0.027032	0.030396	0.045615	0.05122	0.024005	0.047741	0.007303	0.374912	0.864696	1.12124	0.310863	0.594044	0.229861	0.506565	1.00267	0.481075	0.230406	1.02205	0.236417	0.25113	0.511294	0.033553	0.009228	0.010308	0	0.002225	0.016535	0	0	0.00394	0.00581	0.004443	0	0.006961	0	0	0.007285	0	0.004405	0.040683	0.002133	0	0	0.002599
Actinophytocola	0.008781	0	0	0	0	0	0	0.001364	0	0	0	0	0	0	0	0	0	0	0	0	0	0	0	0	0	0	0	0	0	0	0	0	0	0	0	0	0	0	0	0	0	0	0	0	0	0
Actinoplanes	0.005854	0	0	0	0.006911	0	0	0.001364	0	0	0	0	0	0	0	0	0	0	0	0	0	0	0	0	0	0	0	0	0	0	0	0	0	0	0	0	0	0	0	0	0	0	0	0	0	0
Adhaeribacter	0.19318	0.001332	0.009011	0.006608	0.001382	0.004044	0.003001	0.005456	0	0.001334	0	0.001517	0	0.001531	0.001321	0	0.00136	0	0	0	0	0	0	0	0	0	0	0	0	0	0	0	0	0	0	0	0	0	0	0	0	0	0	0	0	0
Aerococcus	0	0	0	0	0	0	0	0	0	0.001334	0.005642	0	0.103621	0	0	0	0	0	0	0	0	0	0.001473	0	0	0	0	0	0	0	0	0	0	0	0	0	0	0	0	0	0	0	0	0	0	0
Aeromicrobium	0.106834	0.003995	0.001802	0	0.009676	0.001348	0	0.005456	0	0	0	0	0	0	0	0	0	0	0	0	0	0	0	0	0	0	0	0	0	0	0	0	0	0	0	0	0	0	0	0	0	0	0	0	0	0
Aeromonas	0	0.003995	0	0	0.008294	0	0.003001	0.001364	0	0	0	0	0	0	0	0	0.00136	0	0	0	0	0	0.001473	0	0	0	0	0	0	0	0	0	0	0	0	0	0	0	0	0	0	0	0	0	0	0
Agromyces	0.017562	0	0	0	0	0	0	0	0	0	0	0	0	0.001531	0	0	0	0	0	0	0	0	0	0	0	0	0	0	0	0	0	0	0	0	0	0	0	0	0	0	0	0	0	0	0	0
Akkermansia	0.139031	0.04394	0.192831	4.50779	3.71282	1.00687	4.83706	0.459673	0.021908	0.232152	2.0496	8.33118	0.304997	3.27184	0.103041	3.42058	0.299303	7.84577	0.185449	2.27453	0.159018	3.92321	0.128192	1.37569	0.024609	0.002062	0	0	0.008268	0	0.071472	0	0	0	0	0	0.004592	0.133353	0	0	1.24012	0.031643	0	0.005059	0.121122	0.002599
Algoriphagus	0.124396	0	0.001802	0.002643	0.002765	0	0	0	0	0	0	0.003034	0	0	0	0	0	0	0	0	0	0	0	0	0	0	0	0	0	0	0	0	0	0	0	0	0	0	0	0	0	0	0	0	0	0
Alistipes	2.17913	0.149129	0.713655	2.86511	1.78868	0.783124	0.582128	2.77031	0.324234	0.172112	0.07194	0.160828	0.082115	0.101049	0.136067	0.049132	0.465281	0.084896	0.029972	0.080577	0.061919	0.078129	0.173869	1.77832	0.196869	0.189671	0.011891	1.70898	0.442322	0.531915	2.20798	0.985105	0.151066	1.46615	0	0.174034	0	2.45854	1.16067	0.582944	1.33483	0	0.038401	0	1.03178	0.600296
Alkanindiges	0	0	0	0	0	0	0	0	0	0	0.026801	0	0.001955	0	0	0	0	0	0	0	0	0	0	0	0	0	0	0	0	0	0	0	0	0	0	0	0	0	0	0	0	0	0	0	0	0
Allisonella	0.002927	0.003995	0.001802	0	0.008294	0.047176	0	0.001364	0.001461	0.001334	0.007053	0.003034	0.029327	0.003062	0.001321	0.010165	0.00136	0	0.003746	0.001414	0.002814	0	0.001473	0	0	0.028863	0	0	0.012402	0.012228	0	0	0	0	0	0	0	0	0	0	0.006608	0	0	0	0	0
Alloprevotella	0.002927	0	0.003604	0.002643	0.026263	0	0.003001	0.002728	0.039434	0.012008	0.083225	0	0.00782	0.004593	0.001321	0.028801	0.010884	0	0.016859	0.028273	0	0	0.309429	0.005592	0.75979	0	0	0	0	0	0	0	0	0	0	0.006961	0	0	0	0	0	0	0	0	0	0
Alloscardovia	0	0	0	0	0.001382	0	0	0	0	0	0.001411	0	0.025416	0.001531	0.002642	0.001694	0	0	0	0	0.001407	0	0.001473	0	0	0	0	0	0	0	0	0	0	0	0	0	0	0	0	0	0	0	0	0	0	0
Altererythrobacter	0.024879	0.002663	0.001802	0	0.001382	0	0	0.002728	0.002921	0	0.004232	0	0.001955	0	0.002642	0	0	0	0.003746	0	0	0	0	0	0	0	0	0	0	0	0	0	0	0	0	0	0	0	0	0	0	0	0	0	0	0
Alterococcus	0.010244	0.005326	0.003604	0	0.006911	0.001348	0	0.004092	0.002921	0	0	0	0	0	0	0	0	0	0	0	0	0	0	0	0	0	0	0	0	0	0	0	0	0	0	0	0	0	0	0	0	0	0	0	0	0
Amaricoccus	0.001463	0	0.003604	0	0	0	0	0.001364	0	0	0	0	0	0	0	0	0	0	0	0	0	0	0	0	0	0	0	0	0	0	0	0	0	0	0	0	0	0	0	0	0	0	0	0	0	0
Amycolatopsis	0.010244	0	0	0	0	0	0	0	0.001461	0	0	0	0	0	0	0	0	0	0	0	0	0	0	0	0	0	0	0	0	0	0	0	0	0	0	0	0	0	0	0	0	0	0	0	0	0
Anaeroarcus	0	0	0	0.001322	0.004147	0	0	0	0	0	0	0	0	0	0	0	0	0	0	0	0	0	0	0	0	0	0	0	0	0	0	0	0	0	0	0	0	0	0	0	0	0	0	0	0	0
Anaerococcus	0.016098	0.010652	0.001802	0.003965	0.004147	0.006739	0	0.016368	0.007303	0	0.001411	0.004552	0.011731	0	0	0.001694	0.00136	0	0	0	0.002814	0	0	0.005592	0.190716	0	0	0	0	0	0	0	0	0	0	0	0	0	0	0	0	0	0	0	0	0
Anaerofilum	0	0	0	0	0	0	0	0	0	0	0	0	0	0	0	0	0	0	0	0	0	0	0	0	0.006152	0	0	0	0	0	0	0	0	0	0	0	0	0.026671	0	0	0	0	0	0	0	0
Anaerofustis	0	0	0	0	0.002765	0	0	0	0	0	0	0.001517	0	0.001531	0	0	0	0	0	0	0	0	0.001473	0	0.006152	0	0	0.002225	0	0	0	0	0	0	0	0	0	0	0.002428	0	0	0	0	0	0	0
Anaerostipes	0.071711	0.037282	0.032439	0.031717	0.124406	0.032349	0.027006	0.283715	0.032131	0.013342	0.040907	0.019724	0.029327	0.033683	0.014531	0.030496	0.013605	0.028299	0.016859	0.238903	0.023923	0.011161	0.027996	0	0.018456	2.24719	0.159338	0.129064	0.037205	0.048912	0.798959	2.11207	0.00581	0.368758	0.14747	0.807518	0.401782	0.191543	1.48362	0.188047	0.028635	3.48522	0.238938	0.571631	0.381311	0.854967
Anaerotruncus	0.017562	0.009321	0.003604	0.006608	0.020734	0.040437	0.024005	0.066837	0.008763	0.001334	0.009874	0.024276	0.021506	0.022966	0.001321	0.001694	0.061221	0.007075	0.001873	0.011309	0.007036	0.005581	0.005894	0	0.003076	0.010308	0	0.002225	0.002067	0	0.012763	0.00394	0.01162	0.071086	0	0	0.002296	0.004849	0.019425	0.021939	0.213661	0.00226	0.002133	0.002529	0.006729	0.002599
Anaerovorax	0.002927	0.001332	0.001802	0.002643	0.002765	0.001348	0.003001	0	0	0.009339	0.011285	0.006069	0.076249	0.006124	0.001321	0.010165	0.004081	0.028299	0.001873	0.008482	0.004222	0.005581	0.00442	0	0	0	0	0	0	0	0	0	0	0	0	0	0	0	0	0	0	0	0	0	0	0
Angiococcus	0.042441	0	0.005406	0	0.002765	0.002696	0	0.001364	0	0	0.001411	0	0	0	0	0	0	0	0	0.001414	0	0	0	0	0	0	0	0	0	0	0	0	0	0	0	0	0	0	0	0	0	0	0	0	0	0
Aquicella	0.001463	0	0	0	0.006911	0	0	0.004092	0.001461	0	0.004232	0	0	0	0	0	0	0	0	0	0	0	0	0	0	0	0	0	0	0	0	0	0	0	0	0	0	0	0	0	0	0	0	0	0	0
Aquipuribacter	0.005854	0	0	0	0	0	0	0	0	0	0	0	0	0	0	0	0	0	0	0	0	0	0	0	0	0	0	0	0	0	0	0	0	0	0	0	0	0	0	0	0	0	0	0	0	0
Arenimonas	0.011708	0.002663	0	0	0.009676	0.001348	0	0.002728	0.001461	0	0	0	0	0	0	0.001694	0	0	0	0.001414	0	0	0	0	0	0	0	0	0	0	0	0	0	0	0	0	0	0	0	0	0	0	0	0	0	0
Aridibacter	0.013171	0.003995	0.001802	0.001322	0.005529	0	0.003001	0.001364	0.001461	0	0	0	0	0	0	0	0	0	0	0	0	0	0	0	0	0	0	0	0	0	0	0	0	0	0	0	0	0	0	0	0	0	0	0	0	0
Arthrobacter	0.412703	0.051929	0.057669	0.023788	0.046998	0.033697	0.024005	0.069565	0.021908	0.002668	0.02398	0.001517	0.001955	0	0	0.001694	0.00136	0	0	0.001414	0	0.005581	0	0	0	0	0	0	0	0	0	0	0	0	0	0	0	0	0	0	0	0.00226	0	0	0	0
Asticcacaulis	0.045368	0.01731	0.005406	0.005286	0.027646	0.013479	0.009002	0.025916	0.021908	0	0.001411	0	0	0	0	0	0	0	0	0	0	0	0	0	0	0	0	0	0	0	0	0	0	0	0	0	0	0	0	0	0	0	0	0	0	0
Atopobium	0.007317	0.007989	0.007209	0.047576	0.019352	0.006739	0	0.031372	0.005842	0.182786	0.489477	0.567449	0.119262	0.14698	0.070015	0.101652	0.072105	0.063672	0.05807	0.37037	0.109765	0.16742	1.33349	0.011184	0	0	0	0	0	0.006114	0	0	0	0	0	0	0	0	0	0	0	0.00226	0	0	0	0
Azonexus	0.014635	0.010652	0.019824	0.013215	0.493476	0	0	0.00682	0.005842	0	0.002821	0	0.001955	0.003062	0	0.008471	0.00136	0.007075	0.001873	0	0.002814	0	0.001473	0	0	0	0	0	0	0	0	0	0	0	0	0	0	0	0	0	0	0	0	0	0	0
Azospira	0	0	0	0	0.002765	0	0	0	0	0	0	0	0	0	0	0	0	0	0	0	0	0	0	0	0	0	0	0	0	0	0	0	0	0	0	0	0	0	0	0	0	0	0	0	0	0
Azospirillum	0.014635	0.002663	0	0.003965	0.015205	0.002696	0.006001	0.004092	0.001461	0	0.004232	0	0	0	0	0	0	0	0	0	0	0	0	0	0	0	0	0	0	0	0	0	0	0	0	0	0	0	0	0	0	0	0	0	0	0
Bacillus	1.76057	1.84547	0.76772	0.396464	0.724317	0.478501	0.303067	1.14577	0.416247	0	0.001411	0.001517	0.001955	0	0	0.003388	0.00136	0	0.001873	0.001414	0	0	0.002947	0	0.003076	0	0	0	0	0	0	0	0	0	0	0	0	0	0	0	0	0	0	0	0	0
Bacteroides	22.6387	0.684393	34.0338	35.9262	8.58952	22.751	21.8058	9.6354	15.8232	19.7849	3.12447	0.945243	1.72245	5.74753	3.78478	0.969081	12.0606	0.841882	2.57568	3.07747	2.86937	0.75339	7.76224	6.80573	28.7982	6.03237	64.7364	60.6444	3.57785	1.40214	43.0442	48.0889	56.7544	44.1887	47.2426	41.6394	55.2714	50.4437	38.1492	43.3917	40.4987	54.995	70.7898	58.5719	75.6791	56.2018
Barnesiella	0.223913	0.031956	0.27573	1.5885	0.165874	0.165791	0.153034	3.25454	0.184025	0.010674	0.026801	0.086483	0.013686	0.007655	0	0.006777	0.012244	0.007075	0.00562	0.016964	0.004222	0	0.014735	0	0.01538	0	0	0	0.132283	0.091709	0	0.102451	0	0	0	0	0	0.305499	0	0	0	0	0	0	0	0
Bauldia	0.013171	0	0	0	0	0.001348	0	0.001364	0.002921	0	0	0	0	0	0	0	0	0	0	0	0	0	0	0	0	0	0	0	0	0	0	0	0	0	0	0	0	0	0	0	0	0	0	0	0	0
Bdellovibrio	0.001463	0.002663	0	0.001322	0.001382	0	0	0.001364	0	0	0	0	0	0	0	0	0	0	0	0	0	0	0	0	0	0	0	0	0	0	0	0	0	0	0	0	0	0	0	0	0	0	0	0	0	0
Bifidobacterium	6.69252	27.1893	2.56808	0.644914	22.5658	33.8604	48.5537	29.1722	42.1505	38.5652	16.291	32.5843	36.9555	37.0696	51.5707	33.1673	20.2248	44.266	40.2049	8.28386	34.2776	35.8279	17.6993	57.2978	22.117	1.14421	0.259221	0.656445	0.08061	0.042798	12.8625	0.898416	0.214979	0.315443	0.417832	0.605639	0.787492	0.290951	0.490494	0.617419	1.02866	8.03725	0.531211	0.11382	0.174955	0.233882
Bilophila	0.175618	0.050597	0.109932	1.6744	0.063585	0.211619	0.027006	0.055925	0.036513	0.010674	0.028212	0.012138	0.017596	0.009186	0.014531	0.106734	0.040814	0.042448	0.009366	0.0311	0.052068	0.011161	0.020629	0.279611	0.027685	0.084527	0.016647	0.028928	0.016535	0.065216	0.086788	0.051225	0.197548	0.417629	0	0.187957	0.087244	0.123654	0.082558	0.181778	0.226877	0.054245	0.292273	0.07841	0.040374	0.075362
Blastocatella	0.010244	0.002663	0.001802	0.001322	0.008294	0	0	0.002728	0.001461	0	0	0	0	0	0	0	0	0	0	0	0	0	0	0	0	0	0	0	0	0	0	0	0	0	0	0	0	0	0	0	0	0	0	0	0	0
Blautia	0.333675	0.201057	0.153184	0.318492	10.6657	0.194096	0.22805	0.356008	0.365129	0.717802	0.888676	0.58869	0.750762	2.17255	0.840181	1.13511	0.763224	0.502299	0.271617	2.49929	1.14268	9.58201	1.19498	0	0.372205	8.25276	0.58741	0.576337	0.297638	0.256787	1.88636	3.17204	0.888966	2.93673	3.61609	3.64079	0.606116	1.7651	2.35048	1.45736	0.158594	5.66179	0.750949	1.08003	1.35478	2.07895
Bordetella	0.013171	0.001332	0.009011	0.002643	0.001382	0.001348	0	0.002728	0.001461	0	0.001411	0	0	0	0.002642	0.001694	0	0	0	0	0	0	0	0.011184	0	0	0	0	0	0	0	0	0	0	0	0	0	0	0	0	0	0	0	0	0	0
Bosea	0.021952	0	0.003604	0.001322	0.005529	0	0	0.004092	0.002921	0	0.001411	0	0	0	0	0	0	0	0	0	0	0	0	0	0	0	0	0	0	0	0	0	0	0	0	0	0	0	0	0	0	0	0	0	0	0
Bradyrhizobium	0.054149	0.003995	0.005406	0.002643	0.016587	0.002696	0	0	0.007303	0	0.002821	0	0.001955	0	0.003963	0.001694	0	0	0.00562	0.004241	0.002814	0	0.001473	0	0	0	0	0	0	0	0	0	0	0	0	0	0	0	0	0	0	0	0	0	0	0
Brevibacterium	0.002927	0	0.003604	0	0	0	0	0	0	0	0	0	0	0	0	0	0	0	0	0	0	0	0	0	0	0	0	0	0	0	0	0	0	0	0	0	0	0	0	0	0	0	0	0	0	0
Brevundimonas	0.076101	0.001332	0.001802	0.001322	0.002765	0.001348	0	0.005456	0	0	0.026801	0.006069	0	0	0.001321	0.005083	0.00136	0	0	0	0	0	0.002947	0	0	0	0	0	0	0	0	0	0	0.004443	0	0	0	0	0	0	0	0	0	0	0	0
Brochothrix	0	0	0	0	0.005529	0.062003	0	0	0	0	0.001411	0	0	0	0	0	0	0	0	0	0	0	0	0	0	0	0	0	0	0	0	0	0	0	0	0	0	0	0	0	0	0	0	0	0	0
Bulleidia	0.001463	0.006658	0.003604	0	0.026263	0.001348	0	0.010912	0.001461	0.005337	0.005642	0.012138	0.00391	0.003062	0.003963	0.013554	0.005442	0.007075	0	0.004241	0.001407	0	0.011788	0	0	0	0	0	0	0	0	0	0	0	0	0	0	0	0	0	0	0	0	0	0	0
Burkholderia	0.007317	0.001332	0.009011	0.002643	0.009676	0.006739	0	0.00682	0.010224	0	0.001411	0.004552	0.00391	0	0.002642	0.003388	0.005442	0	0.001873	0.011309	0.011258	0	0.005894	0	0	0	0	0	0	0	0	0	0	0	0	0	0	0	0	0	0	0	0	0	0	0
Butyricicoccus	0.00439	0	0.003604	0.005286	0.016587	0	0	0	0	0	0	0.003034	0.001955	0.01531	0.002642	0.003388	0.00136	0	0.001873	0.002827	0	0.011161	0.005894	0	0	0.002062	0	0	0	0	0	0	0	0	0.006145	0.024365	0	0	0	0	0	0	0	0	0.002243	0
Butyricimonas	0.048295	0.006658	0.093712	1.47881	0.051145	0.144224	0.072016	0.16641	0.127065	0.088058	0.011285	0.019724	0.011731	0.003062	0.031705	0.010165	0.078907	0	0.00562	0.0311	0.008443	0.005581	0.013261	0	0.055369	0	0.009513	0.218073	0.047539	0.02038	0	0.070928	0.220789	0.590901	0	0	0	0.41703	0	0.322813	0.737902	0	0.403209	0	0	0.602895
Butyrivibrio	0	0	0	0	0	0	0	0	0	0	0.004232	0.001517	0	0.001531	0	0.001694	0	0.007075	0	0.001414	0.001407	0	0.041257	0	0	0	0	0	0	0	0	0	0	0	0	0	0	0	0	0	0	0	0	0	0	0
Campylobacter	0	0	0	0	0.001382	0	0	0	0.002921	0.008005	0.021159	0.010621	0.00391	0.036745	0.007926	0.001694	0.005442	0	0.003746	0.004241	0.002814	0	0.010314	0.033553	0.396813	0.004123	0	0	0.008268	0	0	0	0	0	0	0	0	0	0	0	0.022027	0.00452	0	0	0.002243	0
Candidatus Solibacter	0.010244	0	0	0	0	0.001348	0	0.001364	0	0	0	0	0	0.001531	0	0	0	0	0	0	0	0	0	0	0	0	0	0	0	0	0	0	0	0	0	0	0	0	0	0	0	0	0	0	0	0
Capnocytophaga	0	0	0	0	0	0.001348	0	0	0	0.005337	0.001411	0.001517	0.025416	0.215877	0	0	0.009523	0	0	0.042409	0.001407	0	0.013261	0	0	0	0	0	0	0	0	0	0.00581	0	0	0	0	0	0	0.003134	0	0	0	0	0	0
Cardiobacterium	0	0	0	0	0	0	0	0	0	0	0.002821	0	0.001955	0.013779	0	0.001694	0.00136	0	0	0.007068	0.001407	0.005581	0.020629	0	0	0	0	0	0	0	0	0	0	0	0	0	0	0	0	0	0	0	0	0	0	0
Carnimonas	0	0	0	0	0	0	0	0	0	0	0.015517	0	0	0	0	0.001694	0	0	0	0	0	0	0	0	0	0	0	0	0	0	0	0	0	0	0	0	0	0	0	0	0	0	0	0	0	0
Catellatospora	0.008781	0	0	0	0	0	0	0	0	0	0	0	0	0	0	0	0	0	0	0	0	0	0	0	0	0	0	0	0	0	0	0	0	0	0	0	0	0	0	0	0	0	0	0	0	0
Catelliglobosispora	0.010244	0	0.001802	0	0	0	0	0	0	0	0	0	0	0.001531	0	0	0	0	0	0	0	0	0	0	0	0	0	0	0	0	0	0	0	0	0	0	0	0	0	0	0	0	0	0	0	0
Catenibacterium	0.18879	0.302252	0.102723	0.040968	0.323455	2.9384	0.030007	0.158226	0.947874	0.891249	0.856232	0.374759	0.852428	4.06185	1.48617	0.967387	0.616293	1.30881	0.370898	6.43201	1.7689	0.234388	2.05549	0	0.07075	0	0	0	0.186023	0.521725	0	0	0	0	0	0	0	0	0	0	0	0	0	0	0	0
Catonella	0	0	0	0	0	0	0	0.001364	0	0.010674	0.014106	0.012138	0.001955	0.024497	0.001321	0.003388	0.004081	0	0.00562	0.01555	0.005629	0	0.007367	0	0	0	0	0	0	0	0	0	0	0	0	0	0	0	0	0	0	0	0	0	0	0
Caulobacter	0.011708	0.003995	0	0.003965	0.004147	0.004044	0	0.005456	0.001461	0.001334	0.004232	0	0.001955	0.003062	0	0	0.00136	0	0	0.001414	0	0	0	0	0	0	0	0	0	0	0	0	0	0.004443	0	0	0	0	0	0	0	0	0	0	0	0
Cellulosilyticum	0	0	0	0	0.006911	0	0	0	0	0	0	0	0	0	0	0	0	0	0	0	0	0	0.001473	0	0	0	0	0	0	0	0	0	0	0	0	0	0	0	0	0	0	0	0	0	0	0
Cellulosimicrobium	0.013171	0.001332	0.001802	0	0	0.002696	0	0	0.001461	0	0.001411	0	0.00391	0	0	0	0	0	0	0	0	0	0	0	0	0	0	0	0	0	0	0	0	0	0	0	0	0	0	0	0	0	0	0	0	0
Cellvibrio	0.06732	0.009321	0.014417	0.007929	0.015205	0.005392	0	0.035464	0.007303	0	0.052192	0.003034	0	0	0.001321	0	0.002721	0	0	0.004241	0.002814	0	0.001473	0	0	0	0	0	0	0	0	0	0	0	0	0	0	0	0	0	0	0	0	0	0	0
Chelatococcus	0.00439	0	0	0	0	0	0	0	0	0	0	0	0	0	0	0	0	0	0	0	0	0	0	0	0	0	0	0	0	0	0	0	0	0	0	0	0	0	0	0	0	0	0	0	0	0
Chitinimonas	0.038051	0.015978	0.05046	0.011894	0.034557	0.016175	0.003001	0.0341	0.010224	0	0	0	0	0	0	0	0	0	0	0	0	0	0	0	0	0	0	0	0	0	0	0	0	0	0	0	0	0	0	0	0	0	0	0	0	0
Chitinophaga	0.036587	0.006658	0.003604	0.003965	0.009676	0.002696	0.006001	0.001364	0.001461	0	0	0	0	0	0	0	0	0	0	0	0	0	0	0	0	0	0	0	0	0	0	0	0	0	0	0	0	0	0	0	0	0	0	0	0	0
Christensenella	0.370262	0.114509	0.129755	0.199553	0.409156	0.425933	0.102022	0.297355	0.314011	0.189457	0.173503	0.342897	0.181825	0.081145	0.20344	0.133842	0.440792	0.176866	0.048704	0.14419	0.170276	0.106033	0.269645	0.469746	0.089206	0	0	0.002225	0	0	0	0	0	0.013329	0	0	0	0.002425	0	0	0.017622	0	0	0	0	0.002599
Chryseobacterium	0	0	0	0	0.001382	0	0	0	0	0.001334	0.009874	0	0	0	0	0	0	0	0	0.005655	0.184349	0	0	0	0	0	0	0	0	0	0	0	0	0	0	0	0	0	0	0	0	0	0	0	0	0
Chryseolinea	0.215132	0.003995	0.001802	0.003965	0.011058	0.001348	0.003001	0.009548	0.008763	0	0.001411	0	0	0	0	0.001694	0	0	0	0	0	0	0	0	0	0	0	0	0	0	0	0	0	0	0	0	0	0	0	0	0	0	0	0	0	0
Cloacibacillus	0.001463	0.001332	0	0	0.001382	0	0	0.001364	0.001461	0.004003	0.014106	0.013655	0.043012	0.010717	0.003963	0.028801	0.010884	0.070746	0.001873	0.012723	0.004222	0.022323	0.008841	0.307572	0.043065	0	0	0	0	0	0	0	0	0.0311	0	0	0	0	0	0	0	0	0	0	0	0
Cloacibacterium	0	0	0	0	0.001382	0	0	0	0	0	0	0.001517	0.048878	0	0	0	0	0	0	0	0	0	0	0	0	0	0	0	0	0	0	0	0	0	0	0	0	0	0	0	0	0	0	0	0	0
Clostridium	0.007317	0.037282	0.003604	0.001322	0.005529	0.001348	0.003001	0.008184	0.002921	0	0	0.001517	0	0.003062	0	0	0	0	0	0	0	0	0.001473	0	0	0	0	0.00445	0.006201	0	0	0	0	0	0	0	0	0.118805	0.002428	0.028207	0	0	0	0	0	0
Clostridium III	0.001463	0	0.016219	0	0	0	0	0	0	0.001334	0.004232	0	0.005865	0	0.001321	0.015248	0.00136	0	0	0.001414	0.002814	0	0.001473	0	0	0	0	0	0	0	0	0	0	0	0	0	0	0	0	0	0	0	0	0	0	0
Clostridium IV	0.531245	6.96244	0.259511	0.247129	0.458919	0.211619	0.159035	0.612443	0.220538	0.226815	0.461265	1.54455	0.279581	0.214346	0.171735	0.238882	0.197268	0.134418	0.103027	0.286966	0.710657	0.122775	0.279959	0.318756	0.246086	1.84929	0.049942	0.011126	0.082677	0.04076	0.362467	0.118213	0.156876	0.168829	0	0.285416	0.020663	0.016972	0.721171	0.100291	0.174013	0.00226	0.034134	0.050587	0.024673	0.057171
Clostridium XVIII	0.696619	29.9615	0.40909	0.233913	0.454772	0.483893	0.336074	1.27126	0.328616	0.018679	0.049371	0.180552	0.070384	0.032152	0.019816	0.027107	0.017686	0.007075	0.043084	0.042409	0.049253	0.909649	0.041257	0.117437	0.239934	0.558705	0.161716	0.035604	0.002067	0.002038	0.275679	0.066987	0.226599	0.022214	0.135181	2.8472	0.018367	0.135777	0.269529	0.059548	0.030838	1.13914	0.085335	0.351578	0.011215	0.288454
Clostridium XlVa	1.06395	0.384805	0.731677	2.60873	1.96976	1.25489	0.519114	1.62318	2.38356	0.337554	0.311742	0.321656	0.572847	0.192911	0.118893	0.160949	0.220396	0.084896	0.05807	0.236076	0.697992	0.301356	0.274065	0.425008	7.66865	0.298938	0.58741	0.907897	0.287303	0.042798	1.10272	0.555599	0.854105	1.244	2.31036	0.327184	0.523464	0.281253	0.573052	0.307143	0.568294	4.78935	0.185604	0.839741	0.390283	3.53161
Clostridium XlVb	0.020489	0.014647	0.010813	0.003965	0.026263	0.021566	0.18004	0.009548	0.042355	0.054702	0.149523	0.057655	0.072339	0.02909	0.029063	0.238882	0.156454	0.028299	0.007493	0.212044	0.061919	0.027903	0.086935	0	0.076902	0.010308	0.011891	0.002225	0.002067	0.004076	0.01021	0.051225	0.00581	0.159943	0.027651	0.017403	0.027551	0.024246	0.019425	0.018805	0.519835	0.031643	0.017067	0.027823	0.006729	0.020789
Clostridium sensu stricto	0.273672	2.51122	0.163996	0.09383	0.190755	0.110527	0.075017	0.20733	0.105157	0.056037	0.351239	0.074345	0.048878	0.05818	0.774129	0.098263	0.046256	0.063672	0.022479	0.090472	0.050661	0.050226	0.057465	0	0.009228	0.090712	1.10585	0.193596	0.314173	0.02038	1.46263	0.118213	0.145256	0.079972	0.064518	6.12252	0.516576	0.002425	0.558483	0.379227	0.035243	0	0.027734	0.005059	0.051589	0.007796
Collinsella	0.563442	0.30092	0.174809	0.158585	0.243282	0.850519	0.291064	1.41448	1.04281	0.744486	4.13869	2.728	11.3592	4.56097	0.704114	7.45277	0.844852	9.69933	18.1965	3.59485	3.24369	11.6692	1.60461	13.4437	2.9315	0.371096	0.099883	0.144641	0.5312	0.319964	0	0.342817	0.01162	0.972987	0	0	0.032143	1.84997	0	1.04052	0.762131	0.00452	0	0.002529	0.11215	0
Coprobacillus	0.014635	0.019973	0.003604	0.002643	0.002765	0.005392	0.111024	0.017732	0.011684	0	0	0.001517	0.001955	0	0	0	0	0	0	0	0	0.011161	0	0.027961	0	0.004123	0.02616	0	0	0	0	0	0	0	0.003072	0	0	0.012123	0	0	0.004405	0	0	0	0.002243	0
Coprobacter	0	0	0	0	0	0	0	0	0	0	0	0	0	0	0	0	0	0	0	0	0	0	0	0	0	0	0	0	0	0	0	0	0	0.213258	0	0	0	0	0.041279	0	0	0	0	0	0	0
Coprococcus	0	0	0	0	0	0	0	0.001364	0	0.010674	0.025391	0.022759	0.013686	0.009186	0.010568	0.038967	0.023128	0.09197	0.011239	0.048063	0.08162	0.011161	0.025049	0	0	0.152562	0	0.006676	0.099213	0.163039	0	0.059106	0	0.075529	0	0.083536	0.273211	0.012123	0.002428	0.209985	0	0	0	0	0	0.033783
Corynebacterium	0.231231	0.098531	2.33199	0.040968	0.189373	0.148268	0.036008	0.638359	0.064263	0.056037	0.029623	0.009103	0.244389	0.022966	0.010568	0.02033	0.010884	0.042448	0.014986	0.009895	0.04081	0.089291	0.011788	0.095068	0.003076	0.010308	0	0	0	0	0	0	0	0	0	0.003481	0	0	0	0	0	0.00226	0	0	0	0
Cupriavidus	0.005854	0	0	0.001322	0.001382	0	0	0.005456	0	0	0	0	0	0	0	0	0	0	0	0	0	0	0	0	0	0	0	0	0	0	0	0	0	0	0	0	0	0	0	0	0	0	0	0	0	0
Dechloromonas	0.001463	0	0.001802	0	0.029028	0	0	0	0	0	0	0.001517	0	0	0	0	0.008163	0	0	0.002827	0.001407	0	0	0	0	0	0	0	0	0	0	0	0	0	0	0	0	0	0	0	0	0	0	0	0	0
Deinococcus	0	0	0.003604	0	0	0	0	0	0	0	0	0	0	0	0	0	0	0	0	0	0	0	0	0	0	0	0	0	0	0	0	0	0	0	0	0	0	0	0	0	0	0	0	0	0	0
Desulfobulbus	0	0	0	0	0	0	0	0	0	0.005337	0.004232	0	0.001955	0.001531	0	0	0	0	0.001873	0	0	0	0.001473	0	0	0	0	0	0	0	0	0	0	0	0	0	0	0	0	0	0	0	0	0	0	0
Desulfovibrio	0.414167	0.117172	0.380256	9.85212	0.841811	0.080873	0.024005	0.144586	0.720034	0.521674	0.558596	0.080414	0.16814	0.068897	0.191551	0.365947	0.141489	0.240538	0.039338	0.480633	0.115394	0.050226	0.185657	0.441785	1.11046	0	0	0	0.051673	0.095785	0	0	0	0.039986	0	0	0	0.021821	0	0	0.590321	0	0	0	0	0.064967
Devosia	0.283916	0.046603	0.037845	0.048897	0.074643	0.043132	0.015003	0.043648	0.030671	0.002668	0.019748	0	0	0	0.001321	0	0	0	0	0	0	0	0	0	0	0	0	0	0	0	0	0.00394	0	0	0	0	0	0	0	0	0	0	0	0	0	0
Dialister	0.002927	0.001332	0	0	0.008294	0.004044	0.003001	0.038192	0.007303	0.162773	0.122722	0.113793	1.57386	0.050524	0.121536	0.066074	0.097954	0.063672	0.179829	0.091886	0.064733	0.061387	0.218074	0.005592	0.089206	1.71529	0.004756	0	0.365846	0.093747	0.040841	0	0	0.039986	0.230422	0	0.222702	0	1.84299	0	0.823807	0.00226	0	1.10785	0	0
Dokdonella	0.00439	0	0.003604	0	0.005529	0	0	0.001364	0.002921	0	0	0	0	0	0	0	0	0	0	0	0	0	0	0	0	0	0	0	0	0	0	0	0	0	0	0	0	0	0	0	0	0	0	0	0	0
Dolosigranulum	0.070247	0.041277	0.090108	0.01718	0.059438	0.14692	0.027006	0.365556	0.021908	0	0	0	0.005865	0	0.001321	0	0	0	0	0.001414	0	0	0	0	0	0	0	0	0	0	0	0	0	0	0	0	0	0	0	0	0	0	0	0	0	0
Dongia	0.020489	0.002663	0.003604	0.003965	0.012441	0.002696	0	0.012276	0.002921	0	0	0	0	0	0	0	0	0	0	0	0	0	0	0	0	0	0	0	0	0	0	0	0	0	0	0	0	0	0	0	0	0	0	0	0	0
Dorea	0.002927	0.010652	0.001802	0.001322	0.005529	0.001348	0	0.004092	0.002921	0.334885	0.383682	0.121379	0.146633	0.333767	0.128141	0.140618	0.221757	0.240538	0.095534	0.158326	0.441874	0.044645	0.306482	0	0	1.1504	0.009513	0.102361	0.217027	0.138583	0	0.197021	0	0.013329	0	0.045249	0.034438	0.126079	0.757594	0.310277	0.02423	0.00226	0.149337	0.399636	0.065047	0.771809
Duganella	0.00439	0.006658	0.005406	0	0.008294	0.001348	0	0.004092	0	0	0.001411	0	0	0	0	0.006777	0	0	0	0	0	0	0.002947	0	0	0	0	0	0	0	0	0	0	0	0	0	0	0	0	0	0	0	0	0	0	0
Dyadobacter	0.005854	0	0.003604	0.002643	0.001382	0	0	0	0.001461	0	0	0	0	0	0	0	0	0	0	0	0	0	0	0	0	0	0	0	0	0	0	0	0	0	0	0	0	0	0	0	0	0	0	0	0	0
Eggerthella	0.061466	0.018641	0.02523	0.022466	0.022117	0.01887	0.036008	0.066837	0.011684	0.008005	0.018338	0.092552	0.089935	0.012248	0.007926	0.008471	0.006802	0	0.007493	0.016964	0.014072	0.228807	0.010314	0.173359	0.009228	0.01237	0.004756	0.008901	0	0	0.002553	0.00394	0.023241	0.164386	0.058374	0.087017	0.034438	0.002425	0.014569	0.047012	0.002203	0.011301	0.0192	0.020235	0.042617	0.005197
Eisenbergiella	0.136104	0.0972	0.082899	0.103081	0.342807	0.177922	1.23027	0.793856	0.349063	0.149431	0.213	0.79807	0.213107	0.122483	0.756955	0.176197	0.107477	0.127343	0.035591	0.216285	0.479869	0.094871	0.187131	0	0.104586	0	0.002378	0	0	0	0.020421	0	0	0	0	0	0	0.007274	0.004856	0	0.015419	0	0	0.012647	0	0.010395
Elizabethkingia	0	0	0	0	0.005529	0	0	0	0	0	0	0	0	0	0	0	0	0	0	0	0	0	0	0	0	0	0	0	0	0	0	0	0	0	0	0	0	0	0	0	0	0	0	0	0	0
Elusimicrobium	0.002927	0	0	0	0	0	0	0	0	0.001334	0.008464	0.001517	0	0	0.001321	0	0	0	0	0.001414	0.001407	0	0	0	0	0	0	0	0	0	0	0	0	0	0	0	0	0	0	0	0	0	0	0	0	0
Empedobacter	0	0.005326	0	0	0	0	0	0	0	0	0	0	0	0	0	0	0	0	0	0	0	0	0	0	0	0	0	0	0	0	0	0	0	0	0	0	0	0	0	0	0	0	0	0	0	0
Enhydrobacter	0.00439	0.002663	0.021626	0.001322	0.009676	0.001348	0	0.004092	0.001461	0	0.002821	0	0.00391	0	0	0	0.002721	0	0	0	0	0	0	0	0	0	0	0.102361	0.020669	0.328116	0.015315	0.047285	0	0	0	0	0	0	0	0.059548	0	0.00226	0	0	0	0
Enhygromyxa	0.013171	0	0	0	0	0	0	0	0	0	0	0	0	0	0.001321	0	0	0	0.001873	0	0	0	0	0	0	0	0	0	0	0	0	0	0	0	0	0	0	0	0	0	0	0	0	0	0	0
Enterococcus	4.14752	2.09446	0.619943	0.411001	0.440949	1.06618	5.72526	0.683371	0.300866	1.04869	1.75901	3.06483	2.51232	1.42234	0.771487	0.747141	0.676154	0.714538	12.071	0.856658	0.634666	1.80256	0.993119	2.49972	0.021532	0.002062	0.007135	0	0	0.002038	0	0.007881	0	0	0.003072	0	0	0	0.002428	0	0.013216	0	0.008534	0	0.002243	0
Erythrobacter	0.011708	0	0	0	0.002765	0	0	0.001364	0.001461	0	0.002821	0	0	0	0	0	0	0	0	0	0	0	0	0	0	0	0	0	0	0	0	0	0	0	0	0	0	0	0	0	0	0	0	0	0	0
Escherichia Shigella	0	0	0.007209	0.002643	0.002765	0	0	0	0	0	0	0	0	0	0	0	0	0	0	0	0	0	0	0.15099	0.332216	0.002062	2.73728	0.064532	0.074409	0	1.12824	0	0.052292	0.044429	0.430121	0	0.004592	0.046067	0.769735	0.166108	0.185026	0.018082	0.098135	0.032881	0.069533	0
Eubacterium	0.248793	0.051929	0.079295	0.104402	0.084319	0.114571	0.111024	0.649271	0.049658	0.046697	0.102974	0.130483	0.072339	0.048993	0.113609	0.227022	0.076186	0.056597	0.470178	0.114504	0.084434	0.33484	0.089882	0.447377	0.113815	0.002062	0.004756	0	0.086811	12.9514	0.038289	0.098511	0	0	0	1.05465	0.073469	0.046067	0.002428	0.253863	0.096918	0.020342	0	0.647511	0.278133	0.031184
Ezakiella	0	0.001332	0	0.001322	0	0.001348	0.006001	0	0.001461	0.001334	0.004232	0.006069	0.052788	0.003062	0.003963	0.003388	0.00136	0	0.014986	0.004241	0.008443	0.005581	0.001473	0	0.150727	0	0	0	0	0	0	0	0	0	0	0	0	0	0	0	0.011013	0.00226	0	0	0	0
Faecalibacterium	0.137568	0.081222	1.59311	0.064756	0.346953	0.072786	0.13803	2.39248	0.315471	2.06935	1.64758	0.268552	0.660827	0.387354	0.323655	0.389665	1.97676	0.148567	0.192942	2.8527	0.844345	0.156259	0.889976	1.06252	0.612138	44.3439	13.8505	5.3784	2.54025	1.73229	8.21932	18.4569	5.30475	15.9366	12.5595	15.9067	15.9266	14.2324	21.6133	17.2627	21.7956	8.36498	16.2627	14.4982	1.59926	8.87451
Faecalitalea	0.010244	0.009321	0.014417	0.284132	0.001382	0.004044	0.003001	0.005456	0	0.030687	0.097331	1.79187	0.054743	0.038276	0.030384	0.049132	0.036733	0.021224	0.028098	0.056545	0.057697	0.033484	0.036837	0.005592	0.009228	0	0	0	0	0	0	0	0	0	0	0	0	0	0	0	0	0	0	0	0	0
Ferrovibrio	0.023416	0.001332	0	0.001322	0.001382	0	0	0	0.001461	0	0	0	0	0	0	0	0	0	0	0	0	0	0	0	0	0	0	0	0	0	0	0	0	0	0	0	0	0	0	0	0	0	0	0	0	0
Filimonas	0.00439	0	0.001802	0	0.001382	0	0	0.001364	0	0	0	0	0	0	0	0	0	0	0	0	0	0	0	0	0	0	0	0	0	0	0	0	0	0	0	0	0	0	0	0	0	0	0	0	0	0
Fimbriimonas	0.002927	0.001332	0.001802	0.001322	0	0	0	0	0	0	0.001411	0	0	0	0	0	0	0	0	0	0	0	0	0	0	0	0	0	0	0	0	0	0	0	0	0	0	0	0	0	0	0	0	0	0	0
Finegoldia	0.011708	0.003995	0.009011	0.001322	0.004147	0.001348	0.003001	0.008184	0.002921	0	0.001411	0.012138	0.00391	0.001531	0.001321	0	0.00136	0	0	0.004241	0	0	0.001473	0.022369	0.01538	0	0	0	0	0	0	0	0	0	0	0	0	0	0	0	0.002203	0	0	0	0	0
Flavihumibacter	0.026343	0	0	0.003965	0.004147	0.001348	0	0	0	0	0	0	0.001955	0	0	0	0	0	0	0	0	0	0	0	0	0	0	0	0	0	0	0	0	0	0	0	0	0	0	0	0	0	0	0	0	0
Flavisolibacter	0.103908	0	0	0.003965	0	0	0	0	0	0.001334	0.001411	0	0.001955	0.001531	0	0	0	0	0	0	0	0.005581	0	0	0	0	0	0	0	0	0	0	0	0	0	0	0	0	0	0	0	0	0	0	0	0
Flavitalea	0.023416	0	0.001802	0.003965	0.002765	0.001348	0	0.002728	0.001461	0	0.001411	0	0	0	0	0	0	0	0	0	0	0	0	0	0	0	0	0	0	0	0	0	0	0	0	0	0	0	0	0	0	0	0	0	0	0
Flavobacterium	0.02927	0.001332	0.019824	0.026431	0.013823	0.008087	0.003001	0.00682	0.002921	0	0	0	0	0	0	0	0	0	0	0	0	0	0	0	0	0	0	0	0	0	0	0	0	0	0	0	0	0	0	0	0	0	0	0	0	0
Flavonifractor	0.196107	0.102526	0.077493	0.124225	0.134082	0.506807	0.22805	0.799313	0.258511	0.177449	0.086046	0.031862	0.037147	0.0444	0.033026	0.035578	0.242164	0.007075	0.018732	0.06644	0.053475	0.033484	0.063359	0	0.01538	0.022678	0.045185	0.011126	0	0	0.028078	0.00394	0.040672	0.231029	0.715844	0.027845	0.043622	0.043643	0.05342	0.109694	0.328201	0.045204	0.14507	0.237758	0.006729	0.010395
Fluviicola	0.005854	0	0	0.001322	0.004147	0.002696	0	0	0	0	0	0	0	0	0	0	0	0	0	0	0	0	0	0	0	0	0	0	0	0	0	0	0	0	0	0	0	0	0	0	0	0	0	0	0	0
Fluviimonas	0.001463	0.003995	0.005406	0.005286	0.002765	0.001348	0	0.001364	0.002921	0	0	0	0	0	0	0	0	0	0	0	0	0	0	0	0	0	0	0	0	0	0	0	0	0	0	0	0	0	0	0	0	0	0	0	0	0
Fretibacterium	0	0	0	0	0	0	0	0	0	0	0	0	0.00391	0	0	0	0	0	0	0	0	0	0	0	0	0	0	0	0	0	0	0	0	0	0	0	0	0	0	0	0	0	0	0	0	0
Fusicatenibacter	0.013171	0.014647	0.005406	0.003965	0.012441	0.074134	0.003001	0.00682	0.002921	0.010674	0.016927	0.010621	0.015641	0.0444	0.009247	0.02033	0.014965	0	0.003746	0.093299	0.028145	0.005581	0.014735	0	0	1.95031	0.011891	0.614166	0.256299	0.138583	0.676435	1.47372	0	0.004443	0.015361	1.17299	0.362751	0.804966	3.48445	1.04993	0.378863	0.707441	0.300806	0.46034	0.381311	0.904342
Fusobacterium	0.001463	0.001332	0.001802	0.014537	0.001382	0.006739	0.039009	0.00682	0.002921	0.480314	0.025391	0.062207	0.050833	0.326112	0.010568	0.027107	0.010884	0	0.013113	0.035341	0.011258	0.011161	0.095776	0.005592	0	0.002062	2.60173	0.002225	0.016535	0.006114	0	0	0.040672	0.017771	0	0.006961	0	0	0.002428	0	0.017622	0.013561	0.098135	0.005059	0	0.002599
Gaiella	0.187326	0.005326	0.009011	0	0.019352	0	0	0	0.005842	0	0.002821	0.003034	0.001955	0.001531	0.001321	0	0	0	0.001873	0.001414	0.004222	0	0.001473	0	0	0	0	0	0	0	0	0	0	0	0	0	0	0	0	0	0	0	0	0	0	0
Gallicola	0	0	0	0	0.001382	0	0	0	0	0	0	0.003034	0.001955	0	0	0	0	0	0	0	0	0	0	0	0.092282	0	0	0	0	0	0	0	0	0	0	0	0	0	0	0	0	0	0	0	0	0
Gemella	0.011708	0.038614	0.009011	0.001322	0.037322	0.021566	0.006001	0.054561	0	0.23482	0.617841	0.655449	0.4399	1.58769	0.285344	0.426938	0.382292	0.261762	0.408362	0.609273	1.49731	0.390647	0.671902	0.005592	0.003076	0.002062	0	0.002225	0	0.002038	0	0	0	0	0	0	0	0	0	0.006268	0	0.00452	0	0.002529	0	0
Geminicoccus	0.007317	0	0	0	0	0	0	0	0	0	0	0	0	0	0	0	0	0	0	0	0	0	0	0	0	0	0	0	0	0	0	0	0	0	0	0	0	0	0	0	0	0	0	0	0	0
Gemmatimonas	0.128787	0.002663	0.001802	0.003965	0.015205	0	0	0.00682	0.001461	0	0.001411	0.001517	0	0.001531	0	0	0	0	0	0	0	0	0.001473	0	0	0	0	0	0	0	0	0	0	0	0	0	0	0	0	0	0	0	0	0	0	0
Gemmiger	0	0	0	0	0	0	0	0	0	0	0	0	0	0	0	0	0.00136	0	0	0.007068	0	0	0	0	0	0.010308	0	0	0.124016	0.067254	0.952114	0.216723	0.156876	0.199929	0.37482	0.264532	0.029847	1.23169	0	5.74169	0.178418	0	0.712549	0.235229	0	0.072763
Gemmobacter	0.043905	0.002663	0.005406	0.003965	0.015205	0.004044	0.003001	0.019096	0.008763	0	0.001411	0.001517	0.001955	0.001531	0	0	0	0	0	0.001414	0.002814	0	0	0	0	0	0	0	0	0	0	0	0	0	0	0	0	0	0	0	0	0	0	0	0	0
Geobacter	0.023416	0.010652	0.001802	0.001322	0.006911	0.004044	0	0.002728	0.001461	0	0	0	0	0	0	0	0	0	0	0	0	0	0	0	0	0	0	0	0	0	0	0	0	0	0	0	0	0	0	0	0	0	0	0	0	0
Geodermatophilus	0.001463	0	0.005406	0	0	0	0	0	0	0	0	0	0.001955	0	0	0	0	0	0	0	0	0	0.001473	0	0	0	0	0	0	0	0	0	0	0	0	0	0	0	0	0	0	0	0	0	0	0
Gilliamella	0	0.001332	0	0.002643	0	0	0	0.001364	0	0	0	0	0	0	0	0	0	0	0	0	0	0	0	0	0	0	0	0	0	0	0	0	0	0	0	0	0	0	0	0	0	0	0	0	0	0
Glycomyces	0.074638	0.001332	0	0	0.001382	0	0	0.001364	0	0	0	0	0	0	0	0	0	0	0	0	0	0	0	0	0	0	0	0	0	0	0	0	0	0	0	0	0	0	0	0	0	0	0	0	0	0
Gordonibacter	0.00439	0	0.001802	0.007929	0	0.001348	0.003001	0.015004	0.001461	0.001334	0.001411	0.001517	0.001955	0.001531	0.001321	0.001694	0.00136	0	0	0.002827	0.001407	0.111613	0	0.016777	0	0.004123	0	0.00445	0	0	0	0	0.00581	0	0.021506	0.010442	0	0.004849	0.014569	0.009402	0	0	0.002133	0	0	0.005197
Granulicatella	6.01639	4.611	1.37144	0.588088	0.996627	0.842432	0.735162	1.54816	0.553535	0.057371	0.174914	0.110759	0.070384	0.068897	0.064731	0.067768	0.070744	0.049522	0.166717	0.080577	0.10695	0.217646	0.123771	0	0	0	0	0	0	0	0	0	0	0	0	0.003481	0	0.007274	0	0.003134	0	0.00226	0.004267	0.007588	0	0
Haemophilus	0.024879	0.010652	3.27272	0.027752	0.881898	0.006739	0.039009	2.27518	0.005842	0.177449	0.153755	0.121379	0.252209	0.405726	0.099078	0.10504	0.099314	0.084896	0.061816	0.145604	0.180127	0.039065	0.176816	0	0.052293	0.208226	0.242574	0.115712	0.76683	0.028532	0.051052	0.035464	0.278891	0.026657	0.018434	0.142708	0.016071	1.90573	0.092271	0.065816	0.006608	0.567309	0.096002	0.407224	0.040374	0.010395
Haliea	0.007317	0.001332	0	0	0	0.001348	0	0.001364	0	0	0	0	0.001955	0	0	0	0.00136	0	0	0	0.001407	0	0	0	0	0	0	0	0	0	0	0	0	0	0	0	0	0	0	0	0	0	0	0	0	0
Halomonas	0.106834	0.031956	0.081097	0.026431	0.045615	0.022914	0.018004	0.072293	0.033592	0	0.016927	0	0	0	0	0	0	0	0.001873	0	0	0	0	0	0	0	0	0	0	0	0	0	0	0	0	0	0	0	0	0	0	0	0	0	0	0
Hathewaya	0	0	0	0	0	0.002696	0	0	0	0	0	0	0	0	0	0	0	0	0	0	0	0	0	0	0	0	0	0	0	0	0	0	0	0	0	0	0	0	0	0	0	0	0	0	0	0
Helicobacter	0.001463	0	0	0	0	0	0	0	0	0	0.004232	0.001517	0.001955	0.001531	0.002642	0.001694	0.02857	0	0.00562	0	0.002814	0	0	0	0	0	0	0	0	0	0	0	0	0	0	0	0	0	0	0	0	0	0	0	0	0
Herpetosiphon	0.011708	0.003995	0	0.001322	0.001382	0.001348	0.003001	0.004092	0	0	0	0	0	0	0	0	0	0	0	0	0	0	0	0	0	0	0	0	0	0	0	0	0	0	0	0	0	0	0	0	0	0	0	0	0	0
Holdemania	0.016098	0.009321	0.007209	0.001322	0.060821	0.008087	0.006001	0.012276	0.020447	0.009339	0.07053	0.107724	0.066474	0.036745	0.071336	0.033884	0.151012	0.077821	0.013113	0.070681	0.063326	0.022323	0.041257	0	0.003076	0.004123	0.023782	0.006676	0	0.002038	0.005105	0	0.052292	0.008886	0	0.020884	0.018367	0.075162	0.004856	0.028207	0.127756	0	0.029867	0.027823	0.008972	0.025987
Howardella	0	0	0	0	0	0	0	0	0	0.002668	0.002821	0.004552	0.015641	0.006124	0.023779	0.07285	0.005442	0	0.001873	0.007068	0.002814	0.005581	0.005894	0	0	0	0	0	0	0	0	0.007881	0	0	0	0	0	0	0	0	0	0	0	0	0	0
Hungatella	0.15513	0.099863	0.072086	0.101759	1.44725	0.446152	0.537118	0.446033	0.122683	0.225481	0.150934	0.367173	0.177915	0.085738	0.118893	0.240576	0.23264	0.10612	0.046831	0.180944	0.354625	0.111613	0.825143	0.005592	0.083054	0.002062	0	0.013351	0	0.002038	0.030631	0.00394	0	0.026657	0.030723	0.003481	0.013775	0.002425	0.009713	0.012536	0.037446	0.011301	0	0.030352	0.008972	0.103947
Hydrocarboniphaga	0	0	0	0	0	0	0	0	0	0.001334	0.076172	0	0	0	0.001321	0	0	0	0	0	0	0	0	0	0	0	0	0	0	0	0	0	0	0	0	0	0	0	0	0	0	0	0	0	0	0
Hydrogenophaga	0.035124	0.014647	0.016219	0.003965	0.016587	0.009435	0.003001	0.012276	0.004382	0.004003	0	0.001517	0.005865	0	0	0	0.006802	0.007075	0	0.004241	0	0.005581	0	0	0	0	0	0	0	0	0	0	0	0	0	0	0	0	0	0	0	0	0	0	0	0
Hydrogenophilus	0	0	0	0	0	0	0	0	0	0	0	0	0	0	0	0	0	0	0	0.007068	0	0	0	0	0	0	0	0	0	0	0	0	0	0	0	0	0	0	0	0	0	0	0	0	0	0
Hymenobacter	0	0	0	0	0	0	0	0	0	0	0.005642	0	0	0	0	0	0	0	0	0	0	0	0	0	0	0	0	0	0	0	0	0	0	0	0	0	0	0	0	0	0	0	0	0	0	0
Hyphomicrobium	0.042441	0.001332	0.009011	0.001322	0.009676	0.001348	0	0.001364	0.002921	0	0.002821	0	0	0.001531	0	0	0.00136	0	0	0	0.001407	0	0	0	0	0	0	0	0	0	0	0	0	0	0	0	0	0	0	0	0	0	0	0	0	0
Ilumatobacter	0.055612	0.003995	0.001802	0.001322	0.001382	0	0	0.001364	0	0	0	0	0	0.001531	0	0	0	0	0	0	0	0	0	0	0	0	0	0	0	0	0	0	0	0	0	0	0	0	0	0	0	0	0	0	0	0
Imperialibacter	0.002927	0	0	0	0	0	0	0	0.001461	0	0	0	0	0	0	0	0	0	0	0	0	0	0	0	0	0	0	0	0	0	0	0	0	0	0	0	0	0	0	0	0	0	0	0	0	0
Inquilinus	0.008781	0.001332	0	0	0	0.001348	0	0.001364	0	0	0	0	0	0	0	0	0	0	0	0	0	0	0	0	0	0	0	0	0	0	0	0	0	0	0	0	0	0	0	0	0	0	0	0	0	0
Intestinibacter	0.046832	0.275621	0.023428	0.019823	0.019352	0.013479	0.009002	0.053197	0.016066	0.002668	0	0.003034	0	0	0.002642	0	0.00136	0	0	0.002827	0.002814	0	0	0	0	0.144315	0.02616	0.048955	0.386515	0.052988	0.714723	0.059106	0.069723	0.133286	0.202771	0.567351	0.17908	0.208515	1.14853	0.209985	0.072689	0.00452	0.068268	0.091056	0.235516	0.090954
Intestinimonas	0.011708	0.003995	0.003604	0.003965	0.011058	0.008087	0.006001	0.005456	0.007303	0.010674	0.056424	0.018207	0.025416	0.016841	0.015852	0.108429	0.012244	0.014149	0.007493	0.045236	0.030959	0.005581	0.100196	0	0	0	0	0.008901	0	0.002038	0.015315	0	0	0	0	0	0	0	0	0	0	0	0	0	0.004486	0.002599
Kingella	0	0	0	0	0	0	0	0	0	0.001334	0	0.003034	0	0.001531	0	0	0	0	0	0	0	0	0	0	0	0	0	0	0	0	0	0	0	0	0	0	0	0	0	0	0	0	0	0	0	0
Klebsiella	0.652715	0.583199	0.654184	0.253737	0.630322	2.94245	0.087019	0.413296	0.204472	0.042695	0.139649	0.095586	3.3843	0.571079	0.039631	0.057603	0.072105	0.014149	0.044957	0.135708	0.099914	0.072549	0.094302	0.111844	0.036913	0.020616	0.047564	0.008901	0.082677	0.038722	0.06892	0.023643	0.029051	0.159943	0.003072	0.069614	0.027551	0.169722	0.007285	0.040743	0.008811	1.07359	0.021334	0.005059	0.006729	0
Kocuria	0.007317	0.001332	0.001802	0.001322	0.005529	0.002696	0.003001	0.005456	0	0	0	0	0.001955	0	0	0	0	0	0	0	0	0	0	0	0	0	0	0	0	0	0	0	0	0	0	0	0	0	0	0	0	0	0	0	0	0
Kribbella	0.083419	0.035951	0.014417	0.010572	0.020734	0.010783	0.018004	0.0341	0.021908	0	0	0	0	0	0	0	0	0	0	0	0	0	0	0	0	0	0	0	0	0	0	0	0	0	0	0	0	0	0	0	0	0	0	0	0	0
Kroppenstedtia	0.007317	0	0	0	0	0	0	0.002728	0	0	0	0	0.005865	0	0	0	0	0	0	0	0	0	0	0	0	0	0	0	0	0	0	0	0	0	0	0	0	0	0	0	0	0	0	0	0	0
Ktedonobacter	0.048295	0.014647	0.023428	0.011894	0.020734	0.012131	0.006001	0.031372	0.007303	0	0	0	0	0	0	0	0	0	0	0	0	0	0	0	0	0	0	0	0	0	0	0	0	0	0	0	0	0	0	0	0	0	0	0	0	0
Labilithrix	0.077565	0.001332	0.003604	0	0.009676	0	0	0.001364	0.001461	0	0.001411	0	0	0	0	0	0	0	0	0	0	0	0	0	0	0	0	0	0	0	0	0	0	0	0	0	0	0	0	0	0	0	0	0	0	0
Lachnoanaerobaculum	0	0	0.005406	0	0.004147	0.005392	0	0.002728	0	0.286854	0.332901	0.441518	0.08016	0.402664	0.075299	0.077933	0.212233	0.014149	0.024352	0.162567	0.073177	0.050226	0.366894	0	0	0	0	0	0	0	0	0	0	0	0	0	0	0	0	0	0	0	0	0	0	0
Lachnoclostridium	0.060003	0.037282	0.010813	0.027752	0.100907	0.07683	0.105023	0.060017	0.02775	0.009339	0.038086	0.021241	0.011731	0.004593	0.005284	0.023719	0.040814	0.021224	0.001873	0.029686	0.023923	0.016742	0.017682	0	0	0	0.049942	0.002225	0	0	0.007658	0	0.01162	0	0.003072	0	0.004592	0.004849	0.014569	0	0.008811	0.00226	0.0192	0	0.008972	0.007796
Lachnospiracea incertae sedis	0.984926	0.607166	0.821784	3.47434	0.892956	2.45855	0.930205	9.39533	0.588588	0.19346	0.258139	0.440001	0.70775	0.215877	0.124178	0.206692	0.345559	0.084896	0.118013	0.268589	0.208272	5.77041	0.331531	0.167766	0.052293	7.4549	4.96088	2.71479	0.252165	0.06114	0.293547	1.28458	0	0.048872	17.7671	1.55238	0.51428	0	1.18495	0.347886	0.107932	3.07838	0.733882	4.16582	0.509163	0.501546
Lacihabitans	0.00439	0.002663	0	0.005286	0.005529	0	0	0.001364	0.001461	0	0	0	0	0	0	0	0	0	0	0	0	0	0	0	0	0	0	0	0	0	0	0	0	0	0	0	0	0	0	0	0	0	0	0	0	0
Lactobacillus	0.024879	0.091874	0.021626	0.007929	0.046998	0.068742	0.003001	0.017732	0.004382	0.060039	0.155166	0.298897	0.117307	0.05818	0.050199	0.167726	0.070744	0.042448	0.048704	0.163981	1.46916	0.094871	0.194498	0.022369	0.006152	0.004123	0	0	0.429921	0.01019	0.007658	0	0	0	0	0.045249	0.002296	0	0.033995	0.003134	0.011013	0	0.002133	0	0.051589	0
Lactococcus	0.00439	0.010652	0.010813	0.002643	0.013823	0.009435	0	0.009548	0	0.001334	0	0.001517	0	0.003062	0.001321	0.047438	0.004081	0.007075	0	0	0	0	0.001473	0.329941	0.012304	0	0	0	0	0	0	0	0	0	0	0	0	0.004849	0	0.006268	0.008811	0	0	0	0	0
Lautropia	0.005854	0.001332	0	0	0	0.001348	0	0	0.001461	0.028018	0.038086	0.042483	0.064519	0.084207	0.014531	0.028801	0.025849	0.028299	0.011239	0.040995	0.037996	0.027903	0.026522	0	0	0	0	0	0	0	0	0	0	0.004443	0	0	0	0	0.002428	0	0	0.00226	0	0	0	0.002599
Leptotrichia	0	0	0	0	0.001382	0	0	0	0	0.070713	0.014106	0.188138	0.015641	0.11789	0.006605	0.006777	0.009523	0.021224	0.014986	0.214871	0.023923	0.039065	1.43516	0	0	0	0	0	0	0	0	0	0	0.008886	0	0	0	0	0	0	0	0	0	0	0.002243	0.002599
Leuconostoc	0.005854	0.003995	0.005406	0	0	0.001348	0	0	0	0	0	0.001517	0.00391	0	0	0	0	0	0	0	0	0	0	0.011184	0	0	0	0	0	0	0	0	0	0	0	0	0	0	0	0	0	0	0	0	0	0
Lewinella	0.007317	0.001332	0.003604	0.003965	0.004147	0.002696	0	0.001364	0.004382	0	0.001411	0	0	0	0	0	0	0	0	0	0	0	0	0	0	0	0	0	0	0	0	0	0	0	0	0	0	0	0	0	0	0	0	0	0	0
Litorilinea	0.002927	0	0.003604	0	0.001382	0.001348	0	0	0	0	0	0	0	0	0	0	0	0	0	0	0	0	0	0	0	0	0	0	0	0	0	0	0	0	0	0	0	0	0	0	0	0	0	0	0	0
Lysobacter	0.13025	0.001332	0.005406	0.001322	0.002765	0.001348	0	0.001364	0	0.002668	0.016927	0	0.00391	0.004593	0.001321	0.001694	0.00136	0	0.00562	0	0.004222	0.005581	0.00442	0	0	0	0	0	0	0	0	0	0	0	0	0	0	0	0	0	0	0	0	0	0	0
Magnetospirillum	0.002927	0	0	0	0	0	0	0	0	0	0	0	0	0	0	0	0	0	0	0	0	0	0	0	0	0	0	0	0	0	0	0	0	0	0	0	0	0	0	0	0	0	0	0	0	0
Massilia	0.052685	0.002663	0.028835	0.005286	0.002765	0.002696	0	0.012276	0	0.004003	0.111437	0	0.005865	0.006124	0.002642	0.006777	0.005442	0.007075	0.00562	0.005655	0.016887	0.005581	0.005894	0	0	0	0	0	0	0	0	0	0	0.004443	0	0	0	0	0	0	0	0	0	0	0.002243	0
Megamonas	0.038051	0.021304	0.039647	0.713634	0.015205	0.033697	0.006001	0.028644	0.059881	0.01601	0.019748	0.025793	0.158364	0.018373	0.009247	0.016942	0.017686	0.028299	0.011239	0.195081	0.012665	0.005581	0.022102	0.005592	0.024609	1.27203	0	0.097911	0.113681	0.2629	0	0	4.11365	0	0	0	0	0	0	0.006268	0.015419	1.8059	0	0.237758	0	0
Megasphaera	0.169764	0.109183	0.030637	0.060791	0.197667	0.186009	0.048011	0.18005	2.51501	0.357567	0.722225	0.194207	0.125127	0.133201	0.239108	0.076239	0.193187	0.049522	0.044957	0.148431	0.084434	0.150678	1.02996	0.05033	0.264542	0	0.009513	0	0.004134	0	0	0	0	0.222143	0	0	0	0	0	0	0	0.00452	0.004267	0	0.017944	0
Mesorhizobium	0.074638	0.006658	0.005406	0.005286	0.015205	0.004044	0	0.005456	0.002921	0.001334	0.005642	0	0.001955	0.003062	0	0	0	0	0	0	0.001407	0	0	0	0	0	0	0	0	0	0	0	0	0	0	0	0	0	0	0	0	0	0	0	0	0
Methylobacterium	0	0	0	0.001322	0.012441	0	0	0	0	0.001334	0.093099	0	0.00782	0	0.002642	0	0	0	0.001873	0	0.002814	0	0	0	0	0	0	0	0	0	0	0	0	0	0	0	0	0	0	0	0	0	0	0	0	0
Methylophilus	0.005854	0.002663	0.007209	0.001322	0.004147	0.001348	0	0.002728	0	0	0	0.001517	0	0.001531	0	0	0	0	0	0	0	0	0	0	0	0	0	0	0	0	0	0	0	0	0	0	0	0	0	0	0	0	0	0	0	0
Microlunatus	0.023416	0	0	0	0	0.001348	0	0.001364	0	0	0	0	0	0	0	0	0	0	0	0	0	0	0	0	0	0	0	0	0	0	0	0	0	0	0	0	0	0	0	0	0	0	0	0	0	0
Microvirga	0.051222	0.002663	0	0.002643	0.004147	0	0	0	0.001461	0	0.002821	0	0	0	0	0	0	0	0.001873	0	0	0	0	0	0	0	0	0	0	0	0	0	0	0	0	0	0	0	0	0	0	0	0	0	0	0
Mitsuokella	0	0	0.001802	0	0.006911	0	0	0	0	0	0	0	0	0	0	0	0	0	0	0	0	0	0	0	0	0	0	0	0	0	0	0	0	0	0	0	0	0	0	0	0	0	0	0	0	0
Mogibacterium	0.046832	0.042608	0.016219	0.023788	0.051145	0.01887	0.018004	0.045012	0.026289	0.030687	0.064887	0.068276	0.516149	0.038276	0.030384	0.284625	0.019047	0.070746	0.022479	0.052304	0.04081	0.033484	0.047151	0.016777	0.043065	0	0	0	0	0	0	0	0	0	0	0	0	0	0	0	0	0	0	0	0	0
Moraxella	0.313186	0.117172	0.382058	0.134798	0.17555	0.124006	0.099022	2.94764	0.097855	0.001334	0	0.001517	0	0	0	0	0.00136	0	0	0	0.007036	0	0.002947	0	0	0	0	0.037829	0.012402	0.120241	0.005105	0.00394	0.00581	0	0	0	0	0	0	0.009402	0	0	0	0	0	0
Morganella	0	0	0	0	0	0	0	0	0	0	0	0	0	0	0	0	0	0	0	0	0	0	0	0.162174	0	0	0.002378	0	0	0	0	0	0	0	0	0	0	0	0	0	0	0	0	0	0	0
Moryella	0	0.001332	0	0.001322	0	0.001348	0	0	0.011684	0	0	0.001517	0	0	0	0.001694	0	0	0	0	0	0	0	0	0	0	0	0	0	0	0	0	0	0	0	0	0	0	0	0	0	0	0	0	0	0
Mucilaginibacter	0.00439	0	0.007209	0.006608	0.002765	0.002696	0.003001	0.001364	0.001461	0	0	0	0	0	0	0	0	0	0	0	0	0	0	0	0	0	0	0	0	0	0	0	0	0	0	0	0	0	0	0	0	0	0	0	0	0
Mumia	0.005854	0	0	0	0	0	0	0	0	0	0	0	0	0	0	0	0	0	0	0	0	0	0	0	0	0	0	0	0	0	0	0	0	0	0	0	0	0	0	0	0	0	0	0	0	0
Murdochiella	0	0	0.001802	0	0	0.004044	0	0.001364	0	0	0	0.001517	0.001955	0.001531	0	0	0	0	0.001873	0.001414	0	0.005581	0.001473	0	0	0	0	0	0	0	0	0	0	0	0	0	0	0	0	0	0	0	0	0	0	0
Mycobacterium	0.060003	0.003995	0.012615	0.005286	0.009676	0.002696	0.006001	0.00682	0.005842	0	0	0	0	0	0	0	0	0	0	0.001414	0	0	0	0	0	0	0	0	0	0	0	0	0	0	0	0	0	0	0	0	0	0	0	0	0	0
Mycoplasma	0	0	0	0	0.005529	0	0	0	0	0	0	0	0	0.003062	0	0	0.00136	0	0	0	0	0	0	0	0	0	0	0	0	0	0	0	0	0	0	0	0	0	0	0	0	0	0	0	0	0
Nakamurella	0.001463	0	0	0	0.001382	0	0	0.002728	0	0	0	0	0	0	0	0	0	0	0	0	0	0	0	0	0	0	0	0	0	0	0	0	0	0	0	0	0	0	0	0	0	0	0	0	0	0
Neisseria	0.007317	0.005326	0.028835	0.005286	0.033175	0.005392	0.015003	0.016368	0.004382	0.325546	0.479603	0.388414	0.561117	2.21848	0.30516	0.335451	0.922399	0.311284	0.206054	0.391575	0.544603	0.178581	0.520135	0	0.012304	0	0	0.002225	0.004134	0.008152	0	0	0.017431	0.035543	0	0.010442	0	0	0	0	0	0.015821	0.002133	0	0.004486	0.002599
Niabella	0.016098	0.001332	0.007209	0.002643	0.005529	0.002696	0	0.002728	0	0	0	0	0	0	0	0	0	0	0	0	0	0	0	0	0	0	0	0	0	0	0	0	0	0	0	0	0	0	0	0	0	0	0	0	0	0
Nitrosomonas	0.001463	0.001332	0.001802	0.001322	0.019352	0	0	0.001364	0	0	0	0	0	0	0	0	0	0	0	0	0	0	0	0	0	0	0	0	0	0	0	0	0	0	0	0	0	0	0	0	0	0	0	0	0	0
Nitrospira	0.117079	0.006658	0	0.003965	0.056674	0.001348	0	0.00682	0	0.001334	0.002821	0	0	0	0.002642	0	0	0	0	0.001414	0	0	0	0	0	0	0	0	0	0	0	0	0	0	0	0	0	0	0	0	0	0	0	0	0	0
Nocardioides	0.305869	0.01731	0.007209	0.007929	0.012441	0.009435	0.012003	0.01364	0.011684	0	0.012695	0	0	0	0	0.001694	0.00136	0	0	0.001414	0	0	0	0	0	0	0	0	0	0	0	0	0	0	0	0	0	0	0	0	0	0	0	0	0	0
Nonomuraea	0.011708	0	0	0	0	0	0	0	0	0	0	0	0	0	0	0	0	0	0	0	0	0	0	0	0	0	0	0	0	0	0	0	0	0	0	0	0	0	0	0	0	0	0	0	0	0
Novosphingobium	0.054149	0.009321	0.003604	0.001322	0.008294	0.002696	0	0.004092	0.004382	0.002668	0.069119	0	0.001955	0	0	0	0	0	0	0	0.001407	0	0.001473	0	0	0	0	0	0	0	0	0	0	0	0	0	0	0	0	0	0	0	0	0	0	0
Oceanobacillus	1.22201	0.006658	0.010813	0.003965	0.006911	0.004044	0	0.008184	0.002921	0	0	0	0.001955	0	0	0	0	0	0	0	0	0	0	0	0.003076	0	0	0	0	0	0	0	0	0	0	0	0	0	0	0	0	0	0	0	0	0
Odoribacter	0.25611	0.003995	0.070284	0.084579	0.1092	0.047176	0.030007	0.259163	0.097855	0.04136	0.011285	0.010621	0.035192	0.006124	0.007926	0.015248	0.165977	0.014149	0.003746	0.029686	0.012665	0	0.011788	0.525668	0.624442	0	0.004756	0	0.097146	0.099861	0	0.110332	0	0	0	0	0	0	0.233106	0	2.09476	0	0	0	0.190656	0
Ohtaekwangia	0.583931	0.021304	0.095514	0.087222	0.070497	0.060655	0.039009	0.051833	0.039434	0.001334	0.005642	0	0	0	0	0	0	0	0	0	0	0	0.001473	0	0	0	0	0	0	0	0	0.00394	0	0	0	0	0	0	0	0	0	0	0	0	0	0
Oligoflexus	0.020489	0	0	0	0	0	0	0	0	0	0	0	0	0	0	0	0	0	0	0	0	0	0	0	0	0	0	0	0	0	0	0	0	0	0	0	0	0	0	0	0	0	0	0	0	0
Oligosphaera	0	0	0	0	0	0	0	0	0	0	0	0	0	0	0	0	0	0	0	0.001414	0	0	0	0	0.233781	0	0	0	0	0	0	0	0	0	0	0	0	0	0	0	0	0	0	0	0	0
Olsenella	0.013171	0.011984	0.003604	0.003965	0.023499	0.082221	0.006001	0.009548	0.005842	0.126749	0.23557	0.273104	0.174005	0.270994	0.274776	0.25413	0.102035	0.169791	0.487037	0.20639	0.644517	0.089291	0.287327	0.005592	0.003076	0	0	0	0	0.012228	0	0	0	0.048872	0	0	0	0	0	0	0	0	0	0	0	0
Opitutus	0.124396	0.030625	0.04145	0.026431	0.044233	0.020218	0.030007	0.039556	0.023368	0	0.001411	0	0	0.001531	0.001321	0	0	0	0	0.001414	0	0	0	0	0	0	0	0	0	0	0	0	0	0	0	0	0	0	0	0	0	0	0	0	0	0
Oribacterium	0.001463	0	0	0	0.001382	0.001348	0	0	0	0.008005	0.004232	0.033379	0.001955	0.016841	0.003963	0.008471	0.002721	0	0.003746	0.014136	0.009851	0	0.035363	0	0	0	0	0	0	0	0	0	0	0	0	0	0	0	0	0	0	0	0	0	0	0
Oscillibacter	0.061466	0.034619	0.016219	0.044933	0.429891	0.101092	0.039009	0.178686	0.324234	1.86522	0.204536	0.112276	0.162274	0.075021	0.130783	0.182973	0.669351	0.021224	0.039338	0.414193	0.187163	0.061387	0.126718	0	0.138423	0.197918	0.019025	0.298182	0.119882	0.105975	0.132734	0.149736	0.156876	1.17292	0	0.083536	0.208926	0.23761	0.065561	0.347886	0.607943	0.024862	0.044801	0.020235	0.237759	0.153322
Oxalobacter	0	0	0	0	0	0	0	0	0	0	0	0	0	0	0	0	0	0	0	0	0	0	0	0	0.018456	0	0	0	0	0	0	0	0	0	0	0	0	0	0	0	0.017622	0	0.004267	0	0	0
Paenibacillus	0.027806	0.019973	0.012615	0.002643	0.005529	0.001348	0	0.004092	0.001461	0	0	0	0	0	0	0	0	0	0	0	0	0	0	0	0	0	0	0	0	0	0	0	0	0	0	0	0	0	0	0	0	0	0	0	0	0
Paludibacter	0	0	0	0	0	0	0	0	0	0.002668	0.001411	0	0	0	0	0	0	0	0	0	0	0	0	0	0	0	0	0	0	0	0	0	0	0	0	0	0	0	0	0	0	0	0	0	0	0
Panacagrimonas	0.011708	0.001332	0.003604	0	0.002765	0.001348	0.003001	0.005456	0	0	0.052192	0	0.001955	0	0.001321	0	0.00136	0	0	0	0.001407	0	0	0	0	0	0	0	0	0	0	0	0	0	0	0	0	0	0	0	0	0	0	0	0	0
Parabacteroides	17.5984	0.640454	31.4999	20.4549	7.12982	12.4626	6.49043	3.52325	3.48041	2.87121	0.812504	1.08786	1.46047	0.568017	0.861317	0.454045	9.21174	0.410329	1.55852	1.72745	0.295521	0.200904	0.696951	4.38989	3.70051	2.58736	0.489905	0.456174	0.177756	0.499307	12.8727	1.54465	4.30539	1.87045	4.30121	0.678733	0.14005	3.59083	2.65158	0.883819	9.14558	0.031643	2.23578	0.698098	0.002243	1.07066
Parachlamydia	0.013171	0.009321	0.007209	0.001322	0.005529	0.004044	0	0.008184	0.004382	0	0	0	0	0	0	0	0	0	0	0	0	0	0	0	0	0	0	0	0	0	0	0	0	0	0	0	0	0	0	0	0	0	0	0	0	0
Paracoccus	0.013171	0.001332	0	0	0.005529	0.002696	0	0.001364	0	0	0.007053	0.001517	0	0	0	0	0	0	0	0	0.001407	0	0	0	0	0	0	0	0	0	0	0	0	0	0	0	0	0	0	0	0	0	0	0	0	0
Parafilimonas	0.014635	0.001332	0	0.003965	0.004147	0.006739	0	0.001364	0	0	0	0	0	0	0	0	0	0	0	0	0	0	0	0	0	0	0	0	0	0	0	0	0	0	0	0	0	0	0	0	0	0	0	0	0	0
Paraprevotella	0.021952	0.001332	0.02523	0.062113	0.060821	0.090309	0.054012	0.199146	0.021908	0.100065	0.004232	0.001517	0.001955	0.001531	0.001321	0.005083	0.008163	0	0.011239	0.009895	0.002814	0.072549	0.010314	0	0.003076	0.030925	0	0	0	0	0	1.53282	0	0	0	0	0	0	0	0	0	0	0	0	0	0
Parascardovia	0	0	0	0	0	0.005392	0	0	0	0	0.002821	0.004552	0.001955	0.001531	0.001321	0	0	0	0	0	0	0	0	0	0	0	0	0	0	0	0	0	0	0	0	0	0	0	0	0	0	0	0	0	0	0
Parasegetibacter	0.030733	0	0	0	0	0	0	0	0	0	0	0	0	0	0	0	0	0	0	0	0	0	0	0	0	0	0	0	0	0	0	0	0	0	0	0	0	0	0	0	0	0	0	0	0	0
Parasutterella	0.001463	0.002663	0	0.001322	0.001382	0	0	0	0.001461	0	0	0	0	0	0	0	0	0	0	0	0	0	0	0	0	0.020616	0.45661	2.61243	0.002067	0.002038	1.26098	0.019702	0	0	2.72819	0.174034	0.211222	2.25002	0.905714	0.655029	0	0	0.221871	0	0	0.192303
Parvimonas	0.005854	0	0.001802	0.001322	0.008294	0.002696	0.003001	0.008184	0.005842	0.004003	0.011285	0.015172	0.00782	0.006124	0.005284	0.113511	0.008163	0.007075	0.003746	0.012723	0.009851	0	0.002947	0.005592	0	0	0	0	0.008268	0	0	0	0	0	0	0.003481	0	0	0	0	0.002203	0	0	0	0	0
Patulibacter	0	0	0	0	0	0	0	0	0	0	0.004232	0	0	0	0	0	0	0	0	0	0	0	0	0	0	0	0	0	0	0	0	0	0	0	0	0	0	0	0	0	0	0	0	0	0	0
Pedobacter	0.13025	0.003995	0.016219	0.019823	0.008294	0.021566	0.012003	0.008184	0.014605	0	0.004232	0	0	0	0	0	0	0	0	0	0	0	0	0	0	0	0	0	0	0	0	0	0	0	0	0	0	0	0	0	0	0	0	0	0	0
Peptococcus	0.013171	0.006658	0.007209	0.006608	0.076026	0.002696	0.012003	0.009548	0.014605	0.174781	0.097331	0.068276	0.078204	0.186787	0.067373	0.07285	0.043535	0.063672	0.069309	0.055131	0.032367	0.050226	0.073674	0.016777	0.322987	0	0	0	0	0	0	0	0	0	0	0	0	0	0	0	0	0	0	0	0	0
Peptoniphilus	0.02927	0.009321	0.007209	0.002643	0.002765	0.004044	0	0.005456	0.010224	0.006671	0.015517	0.051586	0.066474	0.016841	0.003963	0.054214	0.013605	0.084896	0.013113	0.021204	0.016887	0.027903	0.017682	0.117437	0.267618	0	0	0	0	0	0	0	0	0	0	0	0	0	0	0	0	0	0	0	0	0
Peptostreptococcaceae incertae sedis	0	0	0	0	0	0	0	0	0	0	0	0	0	0.013779	0	0	0	0	0	0.002827	0	0	0.001473	0	0	0	0	0	0	0	0	0	0	0	0	0	0	0	0	0	0	0	0	0	0	0
Peptostreptococcus	0.06732	0.009321	0.005406	0.014537	0.008294	0.008087	0.015003	0.01364	0.002921	0.012008	0.004232	0.015172	0.029327	0.010717	0	0.010165	0.002721	0.007075	0.001873	0.0311	0.004222	0.005581	0.005894	0.620736	0.046141	0	0	0	0.002067	0	0	0	0	0	0	0	0	0	0	0	0	0	0	0	0	0
Peredibacter	0.013171	0	0.003604	0	0.001382	0.001348	0	0.001364	0	0	0	0	0	0	0	0	0	0	0	0	0	0	0	0	0	0	0	0	0	0	0	0	0	0	0	0	0	0	0	0	0	0	0	0	0	0
Petrimonas	0	0	0	0	0	0	0	0.001364	0	0.009339	0.001411	0	0.021506	0.007655	0.003963	0.333757	0.00136	0	0	0.008482	0.001407	0	0.005894	0	0	0	0	0	0	0	0	0	0	0	0	0	0	0	0	0	0	0	0	0	0	0
Phascolarctobacterium	0.051222	0.04394	0.023428	0.025109	0.326219	0.349104	0.018004	0.0341	0.632403	0.543021	0.352649	0.069793	0.142723	0.067366	0.104362	0.132147	1.85296	0.077821	0.022479	0.207803	0.151982	0.039065	0.358053	0.027961	0.190716	0.053603	0.544603	0.015577	0	0	0.038289	0.295532	0.075533	0.128843	0	0.379394	0	0.523713	0	0.325947	0.039648	0	0.059735	0	0.159254	0.291053
Phaselicystis	0.00439	0.001332	0	0	0.001382	0	0	0	0.001461	0	0	0	0	0	0	0	0	0	0	0	0	0	0	0	0	0	0	0	0	0	0	0	0	0	0	0	0	0	0	0	0	0	0	0	0	0
Phenylobacterium	0.060003	0.002663	0.003604	0.006608	0.015205	0	0.006001	0.008184	0.005842	0.001334	0.009874	0	0	0	0.001321	0	0	0	0	0	0	0	0	0	0	0	0	0	0	0	0	0	0	0	0	0	0	0	0	0	0	0	0	0	0	0
Photobacterium	0	0	0	0	0	0	0	0	0	0	0	0	0.00391	0	0	0	0	0	0	0	0	0	0	0	0	0	0	0	0	0	0	0	0	0	0	0	0	0	0	0	0	0	0	0	0	0
Polyangium	0.010244	0.002663	0	0.002643	0.001382	0	0.006001	0.001364	0	0	0	0	0	0	0	0	0	0	0	0	0	0	0	0	0	0	0	0	0	0	0	0	0	0	0	0	0	0	0	0	0	0	0	0	0	0
Polynucleobacter	0	0	0	0	0.002765	0	0	0	0	0	0	0	0	0	0	0	0	0	0	0	0	0	0	0	0	0	0	0	0	0	0	0	0	0	0	0	0	0	0	0	0	0	0	0	0	0
Pontibacter	0.152203	0	0.001802	0.001322	0.002765	0.001348	0.003001	0.002728	0	0	0	0	0.001955	0	0	0.001694	0	0.007075	0	0	0	0	0	0	0	0	0	0	0	0	0	0	0	0	0	0	0	0	0	0	0	0	0	0	0	0
Porphyromonas	0.024879	0.002663	0.012615	0.027752	0.040086	0.02561	0.009002	0.009548	0.049658	0.220144	0.088868	0.271587	2.62571	0.973743	0.080583	2.22618	0.248966	0.325433	0.095534	0.243144	0.080213	0.022323	0.109037	0.044738	1.06124	0	0.002378	0	0	0.004076	0	0	0	0	0	0.006961	0	0	0	0	0.03304	0	0	0	0.004486	0
Povalibacter	0.103908	0.001332	0.005406	0.003965	0.013823	0.001348	0	0.008184	0.002921	0.001334	0	0	0	0.001531	0.001321	0	0	0	0	0	0	0	0.001473	0	0	0	0	0	0	0	0	0	0	0	0	0	0	0	0	0	0	0	0	0	0	0
Prevotella	0.153666	0.030625	0.234281	0.218055	0.729846	0.284405	0.09002	0.199146	8.96318	5.43422	4.40247	1.49449	1.23758	1.81735	0.28006	0.293096	2.3713	0.410329	6.00367	6.72321	0.232195	0.301356	3.83397	0.044738	0.725953	0.659726	0.002378	0.002225	73.6694	70.5837	0.022973	0	0.034861	0.039986	0	0	0.002296	0.004849	0	0.078353	0.312782	0.006781	0.008534	0	0.006729	0.002599
Promicromonospora	0.035124	0	0	0	0	0	0	0	0.001461	0	0	0	0	0	0	0.001694	0.00136	0	0	0	0	0	0	0	0	0	0	0	0	0	0	0	0	0	0	0	0	0	0	0	0	0	0	0	0	0
Propionibacterium	0	0.01731	0.007209	0	0.004147	0.005392	0	0.004092	0.001461	0	0	0	0	0	0	0.001694	0.006802	0	0	0	0	0	0	0	0	0	0	0	0	0	0	0	0	0	0	0	0	0	0	0	0	0	0	0	0	0
Proteiniphilum	0	0	0	0	0	0	0	0	0	0.009339	0.002821	0.033379	0.009776	0.001531	0	0.057603	0.006802	0.007075	0	0.005655	0	0	0.002947	0	0.049217	0	0	0	0	0	0	0	0	0	0	0	0	0	0	0	0	0	0	0	0	0
Pseudoalteromonas	0	0.009321	0	0	0	0	0	0	0	0	0	0	0	0	0	0	0	0	0	0	0	0	0	0	0	0	0	0	0	0	0	0	0	0	0	0	0	0	0	0	0	0	0	0	0	0
Pseudomonas	0.362945	0.089211	0.167601	0.079293	0.134082	0.114571	0.066015	0.212786	0.065723	0.005337	0.049371	0.009103	0.00782	0.007655	0.007926	0.011859	0.008163	0.021224	0.003746	0.004241	0.008443	0	0.002947	0	0	0	0	0	0.002067	0.002038	0	0	0	0.013329	0	0	0	0	0	0	0	0	0	0	0	0
Pseudonocardia	0.021952	0	0.001802	0	0	0.001348	0	0	0.001461	0	0.02257	0	0.001955	0	0	0	0.002721	0	0	0	0	0	0	0	0	0	0	0	0	0	0	0	0	0	0	0	0	0	0	0	0	0	0	0	0	0
Pseudosphingobacterium	0.005854	0	0	0	0	0	0	0	0	0	0	0	0	0	0	0	0	0	0	0	0	0	0	0	0	0	0	0	0	0	0	0	0	0	0	0	0	0	0	0	0	0	0	0	0	0
Pseudoxanthomonas	0.046832	0.005326	0.003604	0.006608	0.006911	0.004044	0	0.004092	0.005842	0.001334	0.002821	0	0	0	0.001321	0	0	0	0	0	0	0	0	0	0	0	0	0	0	0	0	0	0	0	0	0	0	0	0	0	0	0	0	0	0	0
Psychrobacter	0	0	0	0	0.001382	0	0	0	0	0	0.076172	0	0	0	0	0	0	0	0	0	0	0.005581	0	0	0	0	0	0	0	0	0	0	0	0	0	0	0	0	0	0	0	0	0	0	0	0
Pyramidobacter	0	0	0	0	0	0	0	0	0	0.001334	0	0.001517	0	0	0	0	0.00136	0	0	0	0	0	0	0	0	0.006185	0	0	0.014468	0	0	0	0	0.195486	0	0	0	0.004849	0	0	0	0	0	0	0.006729	0
Reyranella	0.03366	0.001332	0	0	0.001382	0	0	0.001364	0	0	0	0	0	0	0	0	0	0	0	0	0	0	0	0	0	0	0	0	0	0	0	0	0	0	0	0	0	0	0	0	0	0	0	0	0	0
Rhizobium	0.18879	0.049266	0.034241	0.031717	0.071879	0.026958	0.024005	0.058653	0.02775	0.001334	0.019748	0.004552	0.011731	0.001531	0	0	0.00136	0.014149	0	0.001414	0.004222	0.005581	0.002947	0	0	0	0	0	0.002067	0.002038	0	0	0	0	0	0	0	0	0	0	0	0	0	0.002529	0	0
Rhodanobacter	0.005854	0.001332	0.014417	0	0	0	0	0.001364	0	0	0	0	0	0	0	0.001694	0	0	0	0.001414	0.001407	0	0	0	0	0	0	0	0	0	0	0	0	0	0	0	0	0	0	0	0	0	0	0	0	0
Rhodococcus	0	0	0	0	0	0	0	0	0	0.001334	0.021159	0	0	0	0	0	0	0.007075	0	0.001414	0	0	0	0	0	0	0	0	0	0	0	0	0	0	0	0	0	0	0	0	0	0	0	0	0	0
Rhodocytophaga	0.007317	0	0	0	0	0	0	0	0	0	0	0	0	0	0	0	0	0	0	0	0	0	0	0	0	0	0	0	0	0	0	0	0	0	0	0	0	0	0	0	0	0	0	0	0	0
Rhodopirellula	0.002927	0	0	0	0	0	0	0	0	0	0	0	0	0	0	0	0	0	0	0	0	0	0	0	0	0	0	0	0	0	0	0	0	0	0	0	0	0	0	0	0	0	0	0	0	0
Romboutsia	0.001463	0.027962	0.005406	0	0.012441	0	0	0.001364	0	0.006671	0.019748	0.015172	0.017596	0.048993	0.007926	0.03219	0.009523	0	0.003746	0.018377	0.01548	0.005581	0.055992	0	0.046141	0.630863	0.085614	0.017802	0.237697	0.044836	0.740249	0.295532	0.104584	0.724187	0.033795	1.04421	0.082652	0.099408	0.718743	0.115962	0.013216	0	0.027734	0.022764	0.116636	0.051974
Roseburia	0	0	0	0	0.001382	0	0	0	0	0	0.004232	0	0.009776	0.010717	0	0.003388	0.002721	0	0	0	0	0	0.00442	0	0	0.84115	0.741991	1.22833	3.03425	0.158963	0.112314	2.4667	0.447388	0.368758	0	0.501218	0.013775	0.007274	2.52289	1.16589	0.077094	0	0.238938	0	0.928605	0.847171
Roseomonas	0	0	0.018022	0	0	0	0	0	0	0	0.005642	0	0	0	0	0	0	0	0	0	0	0	0	0	0	0	0	0	0	0	0	0	0	0	0	0	0	0	0	0	0	0	0	0	0	0
Rothia	0.001463	0.003995	0.046856	0	0.012441	0.004044	0.006001	0.002728	0	0.591053	0.761722	1.21835	0.537655	0.468499	0.409522	2.32783	1.83527	3.10577	0.417728	1.39242	0.484091	1.42865	0.620331	0	0	0.002062	0	0.002225	0.006201	0	0	0	0	0	0	0	0	0	0	0	0	0.00226	0.002133	0.005059	0.004486	0.002599
Rubellimicrobium	0.013171	0	0	0	0.002765	0	0	0	0	0.001334	0.02257	0	0	0	0	0.001694	0	0	0	0	0	0	0	0	0	0	0	0	0	0	0	0	0	0	0	0	0	0	0	0	0	0	0	0	0	0
Rubrobacter	0.016098	0	0.009011	0.001322	0	0	0	0	0.005842	0	0.001411	0	0.001955	0	0	0	0	0	0	0	0.001407	0	0	0	0	0	0	0	0	0	0	0	0	0	0	0	0	0	0	0	0	0	0	0	0	0
Ruminiclostridium	0	0	0	0	0.002765	0	0	0	0.001461	0.005337	0.008464	0	0.009776	0.004593	0.002642	0.006777	0.00136	0.014149	0.001873	0.0622	0.002814	0	0.00442	0	0	0	0	0	0	0	0	0	0	0.395415	0	0	0	0.23761	0	0	0	0	0	0	1.40412	5.53
Ruminococcus	0	0.013315	0.007209	0	0.002765	0	0	0	0.002921	0.014676	0.101563	0.009103	0.017596	0.006124	0.014531	0.093181	0.013605	0.007075	0.00562	0.038168	0.01548	0	0.025049	0	0	1.14215	0.014269	2.3721	0.405118	0.036684	0.564121	0.890535	0	0.97743	0.009217	0.428124	15.6787	0.463098	6.50268	5.375	4.23137	0.00226	1.18189	0.682922	1.69796	0.457369
Ruminococcus2	0.207815	0.143803	0.104525	0.672666	1.36984	0.129397	0.612135	0.256435	0.131446	0.700458	0.241212	0.470345	0.138813	0.16229	0.219292	0.164337	0.419025	0.042448	0.050577	0.586655	0.240638	0.128355	0.162082	0.011184	0	0.606123	0.047564	0.551859	0.367913	0.187495	0.347151	0.571361	0.052292	0.342101	1.19819	0.776192	0.12857	0.143051	0.009713	0.24446	0.577105	0.083627	0.678414	1.22673	0.645986	0.626283
Runella	0	0	0	0	0.005529	0	0	0	0	0	0	0	0	0	0	0	0	0	0	0	0	0	0	0	0	0	0	0	0	0	0	0	0	0	0	0	0	0	0	0	0	0	0	0	0	0
Saccharibacillus	0	0	0	0	0	0	0	0	0	0	0.009874	0	0	0	0	0	0	0	0	0	0	0	0	0	0	0	0	0	0	0	0	0	0	0	0	0	0	0	0	0	0	0	0	0	0	0
Saccharothrix	0.030733	0	0	0	0	0	0	0	0	0	0	0	0	0	0	0	0	0	0	0	0	0	0	0	0	0	0	0	0	0	0	0	0	0	0	0	0	0	0	0	0	0	0	0	0	0
Salmonella	0.260501	5.22749	0.293752	0.12819	0.233606	0.129397	0.015003	0.185506	0.108078	0.001334	0.015517	0	0.027372	0.004593	0.001321	0	0	0	0.001873	0	0.001407	0	0.002947	0	0	0.010308	0.011891	0.00445	0.02687	0.024456	0.01021	0.011821	0.01162	0.053314	0	0.020884	0	0.026671	0.004856	0	0	0.185336	0	0.002529	0.004486	0
Sandaracinus	0.00439	0	0	0	0	0	0	0	0	0	0	0	0	0	0	0	0	0	0	0	0	0	0	0	0	0	0	0	0	0	0	0	0	0	0	0	0	0	0	0	0	0	0	0	0	0
Scardovia	0	0	0.005406	0	0	0.001348	0	0	0	0.001334	0	0.006069	0.001955	0.001531	0.001321	0.003388	0	0	0	0.001414	0.001407	0	0.001473	0	0	0	0	0	0	0	0	0	0	0	0	0.003481	0	0	0	0	0	0	0	0	0	0
Sediminibacterium	0.024879	0.001332	0.003604	0.005286	0.009676	0.004044	0.018004	0.008184	0.007303	0	0	0	0	0	0	0	0	0	0	0	0.001407	0	0	0	0	0	0	0	0	0	0	0	0	0	0	0	0	0	0	0	0	0	0	0	0	0
Selenomonas	0	0	0	0	0	0	0	0	0	0.001334	0.002821	0.001517	0.001955	0.01531	0	0	0	0	0	0	0	0	0	0	0	0	0	0	0	0	0	0	0	0	0	0	0	0	0	0	0	0	0	0	0	0
Senegalimassilia	0.064393	0.02663	0.030637	0.079293	0.049762	0.276318	0.060013	0.038192	0.08471	0.206802	0.636179	0.392966	0.737077	0.851259	0.142672	0.321898	0.190466	0.29006	1.04338	0.24173	0.450317	1.6463	0.412572	0	0.083054	0	0	0	0	0.006114	0	0	0	0	0	0	0	0	0	0	0	0	0	0	0	0
Seohaeicola	0	0	0	0	0	0	0	0	0	0	0.001411	0	0	0	0	0.003388	0	0	0	0	0	0	0.001473	0	0	0	0	0	0	0	0	0	0	0	0	0	0	0	0	0	0	0	0	0	0	0
Shinella	0.021952	0.011984	0.003604	0.001322	0.009676	0.001348	0	0.008184	0.001461	0	0	0	0	0	0	0	0	0	0	0	0	0	0	0	0	0	0	0	0	0	0	0	0	0	0	0	0	0	0	0	0	0	0	0	0	0
Shuttleworthia	0	0	0	0	0	0	0	0	0	0.001334	0	0.001517	0	0	0.001321	0.005083	0.00136	0	0	0.005655	0.001407	0	0	0	0	0	0	0	0	0	0	0	0	0	0	0	0	0	0	0	0	0	0	0	0	0
Skermanella	0.016098	0	0	0	0	0	0	0.001364	0	0	0.015517	0.001517	0.001955	0	0	0	0	0	0	0	0	0	0	0	0	0	0	0	0	0	0	0	0	0	0	0	0	0	0	0	0	0	0	0	0	0
Slackia	0.001463	0	0	0	0	0	0	0	0.001461	0.002668	0.038086	0.009103	0.035192	0.052055	0.017174	0.025413	0.014965	0.021224	0.318447	0.024032	0.053475	0.027903	0.017682	0	0	0	0	0	0	0	0	0	0	0	0	0	0	0	0	0	0	0	0	0	0	0
Soehngenia	0	0.002663	0	0	0	0	0	0	0	0	0	0	0	0	0	0	0	0	0	0	0	0	0	0	0	0	0	0	0	0	0	0	0	0	0	0	0	0	0	0	0	0	0	0	0	0
Solimonas	0.001463	0	0.003604	0	0.002765	0	0	0	0	0	0	0	0	0	0	0	0	0	0	0	0	0	0	0	0	0	0	0	0	0	0	0	0	0	0	0	0	0	0	0	0	0	0	0	0	0
Solirubrobacter	0.06732	0.001332	0.001802	0.001322	0.016587	0.002696	0	0.002728	0	0	0.001411	0	0.001955	0	0	0.001694	0.00136	0	0	0	0	0	0.001473	0	0	0	0	0	0	0	0.002553	0	0	0	0	0	0	0	0	0	0	0	0	0	0	0
Solitalea	0.008781	0	0.001802	0	0	0	0	0	0	0	0	0	0	0	0	0	0	0	0	0	0	0	0	0	0	0	0	0	0	0	0	0	0	0	0	0	0	0	0	0	0	0	0	0	0	0
Solobacterium	0.045368	0.051929	0.016219	0.142727	0.143758	0.052568	0.072016	0.175958	0.011684	0.058705	0.088868	0.159311	0.060608	0.130139	0.060768	0.121982	0.050337	0.127343	0.063689	0.107436	0.080213	0.206485	0.188604	0	0.003076	0	0	0	0	0	0	0	0	0	0	0	0	0.002425	0	0	0.022027	0.00226	0	0	0	0
Sphingobium	0.013171	0.002663	0.003604	0.003965	0.005529	0.004044	0.003001	0.010912	0.004382	0	0	0	0	0	0	0	0	0	0	0	0	0	0	0	0	0	0	0	0	0	0	0	0	0	0	0	0	0	0	0	0	0	0	0	0	0
Sphingomonas	0.503439	0.023967	0.012615	0.013215	0.055291	0.013479	0	0.012276	0.007303	0.006671	0.263782	0.015172	0.001955	0.009186	0.017174	0.02033	0.009523	0.014149	0.009366	0.007068	0.008443	0.011161	0.013261	0	0	0	0	0	0	0	0	0	0	0.008886	0	0	0	0.002425	0	0	0	0	0	0	0	0
Sphingopyxis	0.021952	0	0.003604	0.003965	0.005529	0.001348	0	0.004092	0.004382	0	0	0	0	0	0	0	0	0	0	0	0	0	0	0	0	0	0	0	0	0	0	0	0	0	0	0	0	0	0	0	0	0	0	0	0	0
Sporichthya	0.026343	0	0.001802	0	0	0	0	0.001364	0	0	0	0	0	0	0	0	0	0	0	0	0	0	0	0	0	0	0	0	0	0	0	0	0	0	0	0	0	0	0	0	0	0	0	0	0	0
Sporobacter	0.055612	0.029293	0.014417	0.019823	0.20596	0.012131	0.012003	0.039556	0.157736	0.046697	0.341364	0.110759	0.140768	0.119421	0.105683	0.150784	0.063942	0.219314	0.056197	1.19451	0.370105	0.072549	0.350686	0	0.003076	0.049479	0	0	0.002067	0.004076	0.005105	0.00394	0	0.2177	0	0.003481	0.004592	0.007274	0.007285	0.883819	0	0	0	0.017705	0.013458	0.080559
Staphylococcus	0.886873	0.243665	0.290148	0.109688	0.221166	0.130745	0.159035	3.4796	0.097855	0.152099	0.358291	0.353518	0.342144	0.267932	0.158525	0.320203	0.228559	0.304209	0.132999	0.397229	0.318037	0.223227	0.285853	0	0.012304	0.004123	0.002378	0.002225	0	0.004076	0	0	0	0.008886	0	0	0	0	0	0	0	0	0	0.002529	0	0.002599
Stenotrophomonas	0.007317	0.002663	0.010813	0	0.004147	0.004044	0.003001	0.004092	0	0.008005	0.005642	0.006069	0.00782	0.004593	0.010568	0.010165	0.005442	0.014149	0.001873	0.011309	0.002814	0.011161	0.005894	0.005592	0	0	0	0	0.002067	0.002038	0	0	0	0.008886	0	0	0	0	0	0	0	0	0	0.002529	0	0
Steroidobacter	0.014635	0.001332	0.001802	0.003965	0	0	0	0	0	0	0	0	0	0	0	0	0	0	0	0	0	0	0	0	0	0	0	0	0	0	0	0	0	0	0	0	0	0	0	0	0	0	0	0	0	0
Stomatobaculum	0	0	0	0	0	0	0	0.001364	0	0.012008	0.029623	0.028828	0.035192	0.01531	0.017174	0.02033	0.016326	0.007075	0.001873	0.042409	0.022516	0	0.042731	0	0	0	0	0	0	0	0	0	0	0	0	0	0	0	0	0	0	0	0	0	0	0
Streptobacillus	0	0	0	0	0	0	0	0	0	0.006671	0.007053	0.084966	0.005865	0.018373	0.002642	0.008471	0.00136	0	0.001873	0.012723	0.021109	0	0.054518	0	0	0	0	0	0	0	0	0	0	0	0	0	0	0	0	0	0	0	0	0	0	0
Streptococcus	0.641007	7.2567	0.699238	0.232592	0.841811	3.99515	0.345076	4.6472	0.261432	3.02064	7.16583	7.22966	4.74896	3.53518	6.49951	10.3126	9.05257	9.23948	6.38394	7.34097	7.66665	11.5464	4.8374	0.067107	0.027685	0.148438	0.068967	0.055631	1.05	0.538029	0.033184	0.133974	0.180117	0.017771	0.027651	0.107901	0.084948	0.055766	0.055848	0.401166	0.019824	0.244101	0.023467	0.073351	0.026916	0.070164
Streptomyces	0.731743	0.286274	0.2505	0.169158	0.226695	0.206227	0.114025	0.377832	0.184025	0	0	0	0	0	0.001321	0	0	0	0	0	0.002814	0	0	0	0	0	0	0	0	0	0	0	0	0	0	0	0	0	0	0	0	0	0	0	0	0
Succinivibrio	0	0	0.027032	0	0	0	0	0	0	0.010674	0.005642	0	0.001955	0.001531	0.001321	0	0.023128	0	0	0	0	0	0.002947	0	0	0	0	0	0	0	0	0	0	0	0	0	0	0	0	0	0	0	0	0	0	0
Sutterella	0.045368	0.01731	0.737083	0.019823	0.035939	0.031001	0.018004	0.061381	0.249748	0.181452	0.035265	0.01669	0.048878	0.024497	0.052842	0.016942	0.227199	0.007075	0.136745	0.026859	0.01548	0	0.014735	0.095068	0.15688	0.154623	0	0	0.23563	0.582865	0	2.2224	0	0	0	0	0	0	0	0	1.12337	0.707441	0	0.994031	0	0
Syntrophomonas	0	0	0	0	0	0	0	0	0	0.001334	0.002821	0	0.00782	0	0.003963	0.044049	0.002721	0.014149	0	0.001414	0.001407	0	0	0	0.009228	0	0	0	0	0	0	0	0	0	0	0	0	0	0	0	0	0	0	0	0	0
Taibaiella	0.002927	0	0	0.002643	0	0	0	0	0	0	0	0	0	0	0	0	0	0	0	0	0	0	0	0	0	0	0	0	0	0	0	0	0	0	0	0	0	0	0	0	0	0	0	0	0	0
Tannerella	0	0	0	0	0	0	0	0	0	0.008005	0.001411	0.001517	0.00782	0.07349	0	0	0	0	0.001873	0.029686	0	0	0.005894	0	0	0	0	0	0	0	0	0	0	0	0	0	0	0	0	0	0	0	0	0	0	0
Tepidimicrobium	0.133177	0	0	0	0	0	0	0	0	0	0.002821	0	0.001955	0	0	0.013554	0	0	0	0	0	0	0	0	0	0	0	0	0	0	0	0	0	0	0	0	0	0	0	0	0	0	0	0	0	0
Terrimonas	0.06293	0.006658	0.010813	0.018502	0.03041	0.009435	0.003001	0.002728	0.008763	0	0	0.001517	0	0.001531	0	0	0	0	0	0	0	0	0	0	0	0	0	0	0	0	0	0	0	0	0	0	0	0	0	0	0	0	0	0	0	0
Thauera	0.001463	0.002663	0.014417	0.001322	0.004147	0	0	0.001364	0	0	0	0	0	0.003062	0	0	0	0	0	0.001414	0.004222	0	0.001473	0	0	0	0	0	0	0	0	0	0	0	0	0	0	0	0	0	0	0	0	0	0	0
Thermogutta	0	0	0	0	0.002765	0	0	0	0	0	0	0	0	0	0	0	0	0	0	0	0	0	0	0	0	0	0	0	0	0	0	0	0	0	0	0	0	0	0	0	0	0	0	0	0	0
Tissierella	0.706864	0	0	0.001322	0	0	0	0	0	0.017345	0.033854	0.406621	0.011731	0.010717	0.031705	0.325286	0.024488	0.035373	0.011239	0.035341	0.02533	0.005581	0.026522	0.061514	0	0	0	0	0	0	0	0	0	0	0	0	0	0	0	0	0	0	0	0	0	0
Tolumonas	0	0	0	0	0.029028	0	0	0	0	0	0	0	0.00391	0	0	0	0	0.007075	0	0	0	0	0.001473	0	0	0	0	0	0	0	0	0	0	0	0	0	0	0	0	0	0	0	0	0	0	0
Treponema	0	0	0	0	0.009676	0	0	0	0	0	0	0	0	0	0	0	0	0	0	0	0	0	0	0	0	0	0	0	0	0	0	0	0	0	0	0	0	0	0	0	0	0	0	0	0	0
Tropheryma	0.002927	0.02663	0.003604	0.001322	0.002765	0.001348	0.006001	0.004092	0	0	0	0	0	0	0	0	0	0	0	0	0	0	0	0	0	0	0	0	0	0	0	0	0	0	0	0	0	0	0	0	0	0	0	0	0	0
Truepera	0.005854	0	0	0	0	0	0	0	0	0	0	0	0	0	0	0	0	0	0	0	0	0	0	0	0	0	0	0	0	0	0	0	0	0	0	0	0	0	0	0	0	0	0	0	0	0
Tumebacillus	0.013171	0	0	0	0	0.001348	0	0	0	0	0	0	0	0.001531	0.001321	0	0	0	0.001873	0.001414	0	0	0	0	0	0	0	0	0	0	0	0	0	0	0	0	0	0	0	0	0	0	0	0	0	0
Turicibacter	0.002927	0.01731	0.001802	0	0.008294	0.001348	0	0.001364	0	0.001334	0.007053	0	0	0.013779	0.001321	0	0.002721	0	0.001873	0.002827	0.002814	0.011161	0	0	0	0.018555	0.002378	0.133514	0.078543	0.028532	0.321625	0.027583	0.01162	0.022214	0	0	0	0.041218	0.070417	0.031341	0.002203	0	0	0.048057	0.002243	0.012993
Turneriella	0	0	0	0	0.006911	0	0	0	0	0	0	0	0	0	0	0	0	0	0	0	0	0	0	0	0	0	0	0	0	0	0	0	0	0	0	0	0	0	0	0	0	0	0	0	0	0
Vampirovibrio	0.010244	0	0.001802	0	0	0	0	0	0	0	0	0	0	0	0	0	0	0	0	0	0	0	0	0	0	0	0	0	0	0	0	0	0	0	0	0	0	0	0	0	0	0	0	0	0	0
Varibaculum	0.131714	1.03857	0.052263	0.022466	0.035939	0.057959	0.075017	0.066837	0.02775	0	0	0	0	0	0	0	0	0	0	0.001414	0	0	0	0.039146	0.049217	0	0	0	0	0	0	0	0	0	0	0	0	0	0	0	0	0	0	0	0	0
Veillonella	0.108298	0.095868	0.109932	0.027752	0.06635	0.039089	0.18304	0.241431	0.052579	1.33554	2.76195	2.94193	0.770314	0.600168	0.639383	0.645489	2.23797	0.424478	0.354039	2.45123	0.713472	3.40979	4.00047	0.425008	0.006152	0.030925	0.045185	0.020027	0.243897	0.026494	0.020421	0.047285	0.01162	0.008886	0.046084	0	0.032143	0.070313	0.067989	0.009402	0.002203	0.090408	0.010667	0.048057	0.015701	0.002599
Vibrio	0.001463	0.005326	0.001802	0	0.001382	0.001348	0	0	0	0	0	0	0	0	0	0.001694	0	0	0	0	0	0	0	0	0	0	0	0	0	0	0	0	0	0	0	0	0	0	0	0	0	0	0	0	0	0
Victivallis	0	0.001332	0	0	0.004147	0.001348	0	0	0.002921	0	0	0	0	0	0	0	0.002721	0	0	0	0.007036	0	0	2.16419	0.227629	0	0	0	0.002067	0.07133	0	0.00394	0	0	0	0	0	0.046067	0	0	0	0	0	0	0	0
Virgibacillus	0.133177	0.001332	0.001802	0.001322	0	0.001348	0	0	0	0	0	0	0	0	0	0	0	0	0	0	0	0	0	0	0	0	0	0	0	0	0	0	0	0	0	0	0	0	0	0	0	0	0	0	0	0
Weissella	0.001463	0	0.007209	0.001322	0	0.005392	0	0.002728	0	0.001334	0.004232	0	0	0.001531	0	0.001694	0.00136	0.007075	0.037464	0.001414	0	0.005581	0.002947	0	0	0	0	0	0	0	0	0	0	0	0	0	0	0.002425	0	0	0.002203	0	0	0	0	0
Zoogloea	0.014635	0.003995	0.005406	0.002643	0.009676	0.002696	0	0.004092	0.001461	0	0.001411	0	0.001955	0	0	0	0	0	0	0	0	0	0	0	0	0	0	0	0	0	0	0	0	0	0	0	0	0	0	0	0	0	0	0	0	0
unclassified Acidobacteria	1.87912	0.051929	0.054065	0.026431	0.125788	0.039089	0.012003	0.046376	0.02775	0.005337	0.018338	0.010621	0.005865	0.009186	0.014531	0.035578	0.019047	0.014149	0.014986	0.022618	0.019701	0.005581	0.008841	0	0	0	0	0	0	0	0	0	0	0	0	0.006961	0	0	0	0	0	0	0	0	0	0
unclassified Armatimonadetes	0.023416	0.006658	0.007209	0.001322	0.020734	0.006739	0.006001	0.015004	0.002921	0	0	0	0	0	0	0	0	0	0	0	0	0	0	0	0	0	0	0	0	0	0	0	0	0	0	0	0	0	0	0	0	0	0	0	0	0
unclassified Campylobacteraceae	0	0	0	0	0	0	0	0	0	0.002668	0.005642	0.001517	0.005865	0.003062	0	0	0	0	0	0	0	0	0	0	0	0	0	0	0	0	0	0	0	0	0	0	0	0	0	0	0	0	0	0	0	0
unclassified Porphyromonadaceae	0.005854	0	0	0	0.001382	0	0	0	0	0.002668	0.001411	0	0.001955	0	0	0	0	0	0	0	0	0	0	0	0	0	0	0	0	0	0	0	0	0	0	0	0	0	0	0	0	0	0	0	0	0
Unclassified	14.6612	3.21558	10.822	7.01873	23.561	4.76344	2.41853	7.39705	11.487	8.3241	40.1611	22.2033	18.9431	21.1789	23.3309	26.4837	9.52193	15.5147	5.53911	38.6048	33.6598	5.79831	39.0411	2.28162	24.2856	13.1203	4.99417	17.6016	8.21603	7.23078	7.00939	10.9347	24.5483	22.632	5.24747	18.0056	7.33079	14.5742	9.18826	14.8181	9.05967	4.56785	3.08487	11.8145	11.7892	14.5033
