# Supplementary material for: Distinct Gut Microbiota Composition and Functional Category in Children With Cerebral Palsy and Epilepsy
Source: Front Pediatr. 2019 Oct 1;7:394. doi: 10.3389/fped.2019.00394 (PMC6779726; doi:10.3389/fped.2019.00394)
Supplement: Supplementary File 3 — Distribution of bacterial functions in all subjects with KEGG database. [file Table_3.XLSX]

## Sheet: Functions
KEGG level II	W01	W09	W07	W17	W08	W12	W02	W20	W30	W23	W10	W13	W15	W21	W25	W18	W24	W16	W28	W19	W14	W11	W27	W22	W26	9001609	9001654	9001646	9001643	9001719	9001742	9001642	9001725	9001711	9001705	9001610	9001728	9001680	9001709	9001676	9001682	9001695	9001685	9001655	9001644	9001672
Cell Growth and Death	0.693504	0.675395	0.644554	0.655047	0.661881	0.661739	0.647263	0.662675	0.638568	0.679869	0.653439	0.671259	0.691744	0.665798	0.665302	0.66807	0.666058	0.665381	0.627993	0.665221	0.674798	0.64733	0.668099	0.668996	0.661367	0.635159	0.635184	0.60007	0.655849	0.611362	0.624679	0.629293	0.635626	0.599753	0.620624	0.600424	0.620925	0.620873	0.622793	0.612548	0.613431	0.617422	0.61511	0.619321	0.669731	0.619513
Cell Motility	2.16543	2.05842	1.82235	1.854	1.7594	1.90447	2.03924	2.00705	2.0853	1.65642	1.70791	1.8103	2.09487	1.65761	1.98186	1.76155	1.86341	1.7523	1.11099	1.89796	1.58428	1.5688	1.82515	1.80438	1.60924	1.70596	1.623	1.43782	1.81498	1.1367	1.27563	1.43183	1.49034	1.34405	1.58833	1.3935	1.5186	1.88273	1.34944	1.32889	1.54572	1.58483	1.33237	1.70381	1.82063	1.79496
Transport and Catabolism	0.473699	0.430081	0.492014	0.335213	0.505651	0.415919	0.378868	0.308039	0.357154	0.372819	0.472891	0.443935	0.359451	0.397884	0.322162	0.348717	0.326714	0.321047	0.522779	0.344309	0.417119	0.495637	0.344484	0.335689	0.313657	0.295022	0.394711	0.501523	0.374596	0.556287	0.591168	0.545924	0.394078	0.3869	0.427578	0.495756	0.497408	0.331089	0.507832	0.459742	0.454904	0.408181	0.537611	0.467021	0.373388	0.379044
Membrane Transport	9.19379	9.66864	9.24722	10.5364	9.08433	10.0532	10.5995	10.678	10.283	10.2666	9.70914	9.6511	10.2638	9.96439	10.7544	10.4053	10.4833	10.7653	9.20894	10.4386	9.80265	9.7456	10.5038	10.567	10.9838	11.1717	10.6025	9.50164	10.1263	8.89449	8.87415	9.07187	10.2348	10.6011	9.77771	9.70088	9.61912	11.207	9.10613	10.0968	9.81303	10.25	8.97775	10.573	9.91178	10.5736
Signaling Molecules and Interaction	0.261937	0.247929	0.265397	0.241869	0.27026	0.255516	0.251027	0.241225	0.229681	0.271688	0.273908	0.259408	0.239553	0.26159	0.237376	0.25031	0.240673	0.252661	0.300349	0.247778	0.265436	0.283364	0.24803	0.2593	0.257848	0.189702	0.213649	0.247718	0.219608	0.261523	0.265302	0.263493	0.22291	0.22894	0.228135	0.254809	0.247608	0.195764	0.25296	0.244212	0.235305	0.220764	0.259025	0.231906	0.218294	0.212544
Signal Transduction	2.694	2.54597	2.4551	2.16977	2.41315	2.44645	2.56826	2.21213	2.20793	2.05948	2.3402	2.31764	2.33965	2.07035	2.17031	2.08601	2.06616	2.0437	1.98813	2.15167	1.9843	2.2137	2.06291	2.08417	2.00365	1.95147	1.9789	2.00544	2.00793	1.89029	1.88947	1.93349	1.93882	1.97624	2.00396	2.03246	1.94747	2.06947	1.97954	1.90075	1.96419	1.9751	1.95203	2.0687	1.99077	2.0978
Folding, Sorting and Degradation	2.69726	2.74401	2.8323	2.79294	2.78229	2.73341	2.67294	2.74797	2.73382	2.84387	2.75811	2.73735	2.73172	2.834	2.74444	2.82553	2.7827	2.78063	2.90253	2.77138	2.86128	2.75835	2.79219	2.79994	2.7807	2.69804	2.74966	2.81326	2.83312	2.87916	2.85636	2.8577	2.79773	2.80424	2.7905	2.82564	2.80311	2.66923	2.84659	2.77638	2.78547	2.7679	2.90677	2.70445	2.8381	2.69416
Replication and Repair	4.85394	5.20286	5.25404	5.77961	5.23105	5.24859	5.17999	5.80944	5.78894	5.89122	5.29087	5.37019	5.5566	5.82091	5.78844	5.84553	5.90532	5.86793	5.63868	5.81194	5.88908	5.38912	5.88714	5.8924	5.88973	5.84927	5.71997	5.63137	5.924	5.66489	5.61641	5.65412	5.77849	5.6077	5.81578	5.57956	5.59735	5.74841	5.70922	5.60127	5.70749	5.74907	5.70235	5.53763	5.98912	5.69578
Transcription	3.12352	3.26017	3.18025	3.3755	3.26433	3.29872	3.32003	3.46345	3.6325	3.29437	3.28829	3.32491	3.30558	3.30079	3.4702	3.32906	3.46101	3.38803	3.2144	3.40741	3.30653	3.33999	3.37623	3.34176	3.43884	3.85857	3.70418	3.57775	3.58708	3.47483	3.45457	3.44333	3.66873	3.6107	3.678	3.50818	3.56204	3.84816	3.51598	3.65987	3.66364	3.69178	3.44125	3.62204	3.57147	3.77076
Translation	5.74192	6.21942	6.22258	7.23555	6.17867	6.29572	6.22692	7.34089	7.16673	7.39996	6.31311	6.44127	6.8205	7.23259	7.2717	7.33609	7.40873	7.43676	6.89897	7.28044	7.31729	6.42477	7.37714	7.51165	7.44375	7.07636	6.8403	6.59989	7.19977	6.58331	6.59679	6.66801	6.86976	6.69889	6.92682	6.46162	6.61641	6.91189	6.78294	6.48863	6.73955	6.83989	6.71467	6.5195	7.33254	6.82128
Cancers	0.08478	0.0788662	0.0796108	0.0664954	0.0827291	0.076853	0.073464	0.062636	0.0652484	0.0634949	0.0784756	0.0780004	0.0750681	0.0665565	0.0639066	0.066398	0.063099	0.0622644	0.0696426	0.0632616	0.068298	0.0747754	0.0644137	0.0619367	0.0589968	0.0580275	0.0597872	0.0690824	0.0638764	0.0682104	0.0669202	0.0672793	0.0617422	0.0607538	0.0645492	0.0640351	0.0668986	0.0593588	0.0691676	0.0624104	0.0635012	0.0660043	0.069685	0.0626897	0.0650693	0.0636049
Immune System Diseases	0.0639273	0.0607593	0.0667063	0.058054	0.0637268	0.0649812	0.0646136	0.0548763	0.0459522	0.0630617	0.0665412	0.0615687	0.0567165	0.059864	0.0538171	0.0594998	0.0539289	0.0596491	0.0671744	0.0558907	0.0600968	0.0662925	0.0559663	0.0580855	0.0585764	0.0480016	0.055482	0.0515013	0.0559098	0.0541513	0.054515	0.059258	0.0545824	0.0541757	0.0445158	0.0616433	0.059906	0.0491295	0.0520694	0.0585816	0.0502812	0.0519353	0.055856	0.0610993	0.0549921	0.0486508
Infectious Diseases	0.465676	0.478342	0.483526	0.489932	0.48107	0.485489	0.49542	0.478001	0.461208	0.4961	0.490569	0.4728	0.472899	0.483005	0.470291	0.485033	0.472529	0.476863	0.512858	0.476786	0.478105	0.471731	0.475005	0.478898	0.486058	0.429436	0.43242	0.469868	0.462852	0.469847	0.458415	0.452207	0.444225	0.475345	0.454442	0.47567	0.451383	0.427453	0.463072	0.455391	0.451401	0.449283	0.461037	0.433508	0.459366	0.443206
Metabolic Diseases	0.109588	0.117076	0.12128	0.128418	0.122711	0.118509	0.117439	0.127024	0.12948	0.133055	0.125495	0.124197	0.121816	0.132298	0.126859	0.130212	0.128986	0.130399	0.14456	0.128847	0.134817	0.128015	0.13214	0.130861	0.132147	0.118392	0.122158	0.131103	0.127321	0.135825	0.1352	0.13565	0.122064	0.122714	0.128906	0.12788	0.130197	0.119472	0.134848	0.125552	0.12737	0.126602	0.132096	0.124657	0.12919	0.123466
Neurodegenerative Diseases	0.195372	0.169232	0.17715	0.131525	0.16914	0.171074	0.171798	0.123347	0.106945	0.132838	0.164054	0.152063	0.158277	0.12968	0.122846	0.13011	0.114895	0.12387	0.132316	0.124553	0.126905	0.152664	0.124098	0.124469	0.118554	0.07845	0.088599	0.101225	0.100734	0.0992178	0.0998536	0.101904	0.0950193	0.0997913	0.0934568	0.106028	0.0941381	0.0845451	0.101453	0.0956519	0.0905062	0.0922877	0.107214	0.0966949	0.0996558	0.0956079
Amino Acid Metabolism	9.62035	9.26845	9.29252	8.97809	9.2846	9.26806	9.16755	9.02802	9.01266	8.94084	9.24419	9.26126	9.16157	9.07291	9.00812	8.94849	8.95942	8.96069	9.14152	9.04247	9.02342	9.20512	8.9429	9.03081	9.03506	9.19227	9.17962	9.1041	8.93605	9.20239	9.19159	9.21193	9.13011	9.01382	9.20737	8.99576	9.14303	9.10743	9.25624	9.02595	9.20822	9.15246	9.16511	8.97406	8.98845	9.13299
Biosynthesis of Other Secondary Metabolites	0.985006	0.911909	0.925006	0.794291	0.967172	0.88902	0.862056	0.796072	0.819299	0.842194	0.937768	0.927209	0.821747	0.854159	0.813626	0.813889	0.818288	0.802367	0.922631	0.820519	0.867217	0.967196	0.82006	0.805415	0.811906	0.845203	0.912087	0.984711	0.863963	1.03829	1.06665	1.00278	0.910683	0.863853	0.931802	0.95365	0.99025	0.86648	0.977541	0.927837	0.954807	0.90496	1.00626	0.968915	0.859077	0.898782
Carbohydrate Metabolism	8.1139	8.24241	8.38414	8.29252	8.58804	8.43021	8.39823	8.25521	8.36317	8.50445	8.6323	8.48603	8.19797	8.49101	8.3159	8.35351	8.35119	8.48321	9.13383	8.36052	8.53696	8.89779	8.39719	8.32739	8.57471	8.83899	9.12689	9.32659	8.58814	9.43793	9.59553	9.49149	9.15072	9.10971	8.97231	9.34774	9.43998	8.85708	9.20221	9.40744	9.26358	9.00074	9.2458	9.38209	8.47557	8.91654
Energy Metabolism	5.91232	5.70623	5.68772	5.46229	5.7216	5.59142	5.49903	5.43208	5.49259	5.45328	5.59649	5.64603	5.52613	5.51065	5.42109	5.47097	5.44863	5.39889	5.55878	5.43218	5.51433	5.57194	5.41022	5.39072	5.35221	5.49005	5.56461	5.61978	5.50194	5.73527	5.72662	5.73396	5.6055	5.58949	5.57008	5.62922	5.71171	5.4377	5.65805	5.68077	5.59627	5.56366	5.65523	5.51511	5.55459	5.49748
Enzyme Families	2.66466	2.72	2.67933	2.74724	2.68826	2.70488	2.69575	2.75194	2.77544	2.7638	2.71245	2.72568	2.68171	2.77565	2.75607	2.76397	2.78566	2.75101	2.73039	2.7701	2.78281	2.71257	2.77161	2.76007	2.75701	2.78903	2.78342	2.75249	2.82969	2.76338	2.76297	2.76306	2.73779	2.75219	2.78954	2.7843	2.76103	2.78968	2.76756	2.79381	2.78287	2.78059	2.77324	2.76537	2.83935	2.77613
Glycan Biosynthesis and Metabolism	1.83881	1.95387	2.1082	1.9949	2.18186	1.90414	1.83185	1.90548	2.0788	2.09503	2.11024	2.05538	1.87391	2.17423	1.92992	2.06802	2.02741	1.98529	2.51178	2.01222	2.24033	2.19197	2.07464	1.99023	1.96462	1.85848	2.08666	2.42241	2.16659	2.57064	2.62732	2.49375	2.14579	2.19446	2.23142	2.39493	2.36772	1.92677	2.42296	2.31764	2.27347	2.14065	2.54596	2.27681	2.15128	2.05192
Lipid Metabolism	3.23343	2.84601	2.88725	2.39501	2.84899	2.84716	2.8122	2.38847	2.31185	2.43005	2.78967	2.74405	2.64787	2.44736	2.40365	2.3896	2.3484	2.37403	2.5113	2.42063	2.40507	2.72922	2.35202	2.3769	2.36096	2.33762	2.40789	2.49863	2.30701	2.52081	2.54249	2.52109	2.41867	2.39996	2.39772	2.48307	2.50554	2.36702	2.48123	2.47539	2.4629	2.42495	2.49475	2.43894	2.29119	2.39918
Metabolism of Cofactors and Vitamins	5.43769	5.38572	5.43949	5.43195	5.4307	5.31358	5.21755	5.34938	5.47289	5.36157	5.35355	5.42157	5.37823	5.473	5.32832	5.42982	5.42289	5.36247	5.50206	5.37617	5.51479	5.32305	5.42455	5.37198	5.32985	5.46452	5.4895	5.43389	5.52948	5.56653	5.52994	5.50478	5.5112	5.48355	5.43885	5.46552	5.46927	5.36895	5.54105	5.44916	5.48133	5.46589	5.51545	5.37047	5.56143	5.35681
Metabolism of Other Amino Acids	2.29493	2.10443	2.13532	1.85028	2.08999	2.10275	2.09563	1.81764	1.73588	1.90084	2.09024	2.05532	1.99853	1.88603	1.81759	1.84691	1.79371	1.82347	1.94298	1.84067	1.86614	2.0293	1.82213	1.84151	1.83062	1.67259	1.73968	1.83067	1.7764	1.88073	1.86507	1.84509	1.7656	1.78309	1.77231	1.82981	1.81177	1.68442	1.83302	1.7744	1.7775	1.74088	1.86533	1.77471	1.75389	1.7439
Metabolism of Terpenoids and Polyketides	2.14118	1.91998	1.93299	1.69441	1.89505	1.91339	1.88704	1.67921	1.6045	1.73096	1.86521	1.87313	1.8158	1.71815	1.67595	1.69835	1.68192	1.68951	1.7008	1.69314	1.70496	1.82677	1.6821	1.68813	1.66102	1.57101	1.58999	1.61135	1.61949	1.64524	1.63372	1.641	1.60654	1.59442	1.61212	1.61398	1.63189	1.55568	1.62761	1.61707	1.61002	1.59701	1.63501	1.58552	1.64178	1.59781
Nucleotide Metabolism	3.50102	3.70079	3.74178	4.14161	3.7436	3.75323	3.70995	4.14505	4.10102	4.2423	3.80936	3.84251	3.94688	4.16695	4.11655	4.17266	4.18973	4.21381	4.17497	4.13527	4.21386	3.88147	4.19158	4.22027	4.236	4.06388	4.02559	3.95586	4.16646	4.00746	3.99897	3.99841	4.04348	3.99582	4.0546	4.00975	3.96945	4.01042	4.03956	4.04289	4.01114	4.02662	4.0234	3.95712	4.19774	3.98295
Xenobiotics Biodegradation and Metabolism	2.6305	2.16429	2.13462	1.62719	2.0295	2.13089	2.14077	1.61186	1.46135	1.59501	1.99032	2.01526	2.00258	1.61251	1.61687	1.57522	1.5497	1.56928	1.48761	1.60666	1.54637	1.83954	1.54155	1.57502	1.50319	1.4127	1.41191	1.43174	1.40267	1.43048	1.40135	1.38512	1.4352	1.45097	1.44526	1.44818	1.3913	1.3992	1.42974	1.41027	1.41189	1.41583	1.41557	1.38727	1.42993	1.45823
Digestive System	0.0599718	0.0594659	0.0720093	0.0567644	0.0731958	0.0598195	0.0531764	0.0486185	0.0537671	0.0655257	0.0689087	0.0697846	0.0554477	0.0642287	0.0491424	0.0592759	0.0557931	0.0525199	0.0755954	0.0531902	0.0700969	0.0719764	0.0580091	0.0553063	0.0478561	0.0226791	0.0381287	0.0568828	0.0619807	0.0674955	0.0680758	0.0657842	0.0409296	0.0453858	0.0497106	0.0573489	0.056462	0.0279575	0.0603602	0.0505758	0.0507897	0.0421086	0.0657779	0.0537258	0.0708477	0.0401375
Endocrine System	0.378848	0.336735	0.349884	0.287828	0.336366	0.332467	0.309487	0.285318	0.287355	0.298548	0.325216	0.330032	0.314365	0.303219	0.29053	0.291333	0.29304	0.282805	0.3139	0.293465	0.304295	0.324122	0.286899	0.291976	0.278378	0.290186	0.301851	0.320769	0.290707	0.335184	0.329707	0.331437	0.297783	0.29248	0.31582	0.307754	0.320951	0.290498	0.328172	0.312435	0.320557	0.308849	0.328633	0.308967	0.298688	0.300641
Environmental Adaptation	0.189439	0.187901	0.180368	0.191592	0.186068	0.186587	0.183457	0.202445	0.210974	0.187479	0.179753	0.186106	0.195706	0.187313	0.198186	0.189874	0.199156	0.194969	0.172001	0.196669	0.188356	0.179141	0.194474	0.193592	0.190969	0.215862	0.206584	0.186014	0.205619	0.177347	0.175237	0.19066	0.199082	0.183784	0.198073	0.179086	0.195738	0.217201	0.190146	0.183054	0.199487	0.203104	0.187232	0.200416	0.208523	0.205189
Excretory System	0.0496671	0.0396158	0.0425062	0.0273954	0.0414128	0.0373593	0.0372493	0.026668	0.029707	0.0272663	0.0394901	0.0356619	0.0293324	0.0314645	0.0255743	0.0258633	0.0256124	0.0258434	0.0410887	0.0271595	0.0282206	0.0372735	0.025471	0.0275539	0.0235427	0.0176823	0.0228949	0.0361849	0.02198	0.0376498	0.0360601	0.0358349	0.024436	0.026657	0.0334771	0.0331591	0.031936	0.0206421	0.0375799	0.0330326	0.0336432	0.0291248	0.0360635	0.024434	0.0184517	0.0265206
Immune System	0.0373036	0.044016	0.0470375	0.0497494	0.0496439	0.0451157	0.0414066	0.0480408	0.0551587	0.048332	0.0474657	0.0489152	0.0473971	0.052027	0.0487334	0.0498545	0.0526189	0.0488778	0.0546397	0.0489846	0.0539266	0.0488697	0.0511445	0.0481995	0.0478561	0.0574795	0.0598314	0.061826	0.0589093	0.063385	0.062434	0.0646926	0.0591914	0.056445	0.0624328	0.0593602	0.0635067	0.0593384	0.0613675	0.0602871	0.062908	0.0618014	0.0622307	0.0608102	0.0605192	0.0583899
Nervous System	0.117094	0.121462	0.125926	0.1207	0.129286	0.121494	0.115684	0.123866	0.1351	0.123226	0.128949	0.129774	0.120351	0.129175	0.125125	0.123354	0.126853	0.123289	0.144367	0.12535	0.130348	0.135413	0.123509	0.126295	0.124965	0.140636	0.144986	0.152799	0.135911	0.160697	0.159569	0.158504	0.13963	0.138197	0.153437	0.145737	0.154331	0.140358	0.157319	0.152806	0.154007	0.147933	0.154279	0.142064	0.136838	0.142409
Cellular Processes and Signaling	4.84978	5.15578	5.30139	5.01476	5.33508	5.09142	5.04701	4.88004	5.21987	4.8218	5.19664	5.16806	4.99508	5.04608	4.94188	4.9956	4.97172	4.84316	5.23055	4.99621	5.11417	5.17576	4.99451	4.82451	4.81552	5.22035	5.34314	5.65241	5.34827	5.72303	5.60587	5.60151	5.461	5.53204	5.41876	5.70646	5.55652	5.27986	5.58522	5.61739	5.51246	5.49677	5.66382	5.4975	5.31282	5.39113
Genetic Information Processing	3.09256	3.24619	3.18841	3.47116	3.21327	3.21202	3.21806	3.50592	3.48555	3.4404	3.21098	3.24377	3.34336	3.42823	3.47427	3.50526	3.5021	3.495	3.39134	3.45798	3.42861	3.20098	3.47674	3.52678	3.47962	3.30215	3.16462	3.23424	3.34166	3.19126	3.12873	3.13512	3.24086	3.28694	3.33566	3.23671	3.12479	3.22848	3.30372	3.19052	3.2063	3.26129	3.24407	3.08805	3.38433	3.27122
Metabolism	3.38233	3.37724	3.39023	3.178	3.45798	3.33989	3.34644	3.15583	3.21074	3.17929	3.37682	3.33749	3.1989	3.18482	3.14562	3.15739	3.13018	3.13254	3.42188	3.1544	3.18521	3.38674	3.15592	3.11562	3.12634	3.03911	3.10949	3.30456	3.11583	3.33316	3.31338	3.27248	3.12668	3.25118	3.2176	3.31759	3.25374	3.10549	3.28742	3.31478	3.19986	3.18782	3.29684	3.21557	3.08528	3.19364
Poorly Characterized	6.59556	6.50931	6.57552	6.32824	6.60722	6.4577	6.48678	6.23187	6.14789	6.30785	6.53185	6.45228	6.32297	6.30072	6.23891	6.32854	6.21973	6.24907	6.49017	6.25672	6.29907	6.48373	6.25542	6.28058	6.20282	5.99376	6.06927	6.28243	6.17549	6.33135	6.31908	6.23529	6.13842	6.28292	6.14785	6.31254	6.21583	6.03426	6.25734	6.19555	6.12019	6.15589	6.35483	6.18572	6.1532	6.12165
